## Identification of DAXX As A Restriction Factor Of SARS-CoV-2 Through A CRISPR/Cas9 Screen

Alice Mac Kain\*<sup>1</sup>, Ghizlane Maarifi\*<sup>2</sup>, Sophie-Marie Aicher<sup>3</sup>, Nathalie Arhel<sup>2</sup>, Artem Baidaliuk<sup>4</sup>, Sandie Munier<sup>5,6</sup>, Flora Donati<sup>5,6</sup>, Thomas Vallet<sup>1</sup>, Quang Dinh Tran<sup>1</sup>, Alexandra Hardy<sup>1</sup>, Maxime Chazal<sup>3</sup>, Françoise Porrot<sup>7</sup>, Molly OhAinle<sup>8</sup>, Jared Carlson-Stevermer<sup>9</sup>, Jennifer Oki<sup>9</sup>, Kevin Holden<sup>9</sup>, Etienne Simon-Lorière<sup>4</sup>, Timothée Bruel<sup>7</sup>, Olivier Schwartz<sup>7</sup>, Sylvie van der Werf<sup>5,6</sup>, Nolwenn Jouvenet\*<sup>3</sup>, Sébastien Nisole\*<sup>2</sup>, Marco Vignuzzi\*<sup>1</sup>, Ferdinand Roesch\*<sup>1,10</sup>

### Author Affiliations:

- 1 Institut Pasteur, Université de Paris, CNRS UMR 3569, Viral populations and pathogenesis Unit, F-75015 Paris, France
- 2 Institut de Recherche en Infectiologie de Montpellier (IRIM), Université de Montpellier, CNRS, 34090 Montpellier, France
- 3 Institut Pasteur, Université de Paris, CNRS UMR 3569, Virus sensing and signaling Unit, F-75015 Paris, France
- 4 Institut Pasteur, G5 Evolutionary genomics of RNA viruses, F-75015 Paris, France
- 5 Institut Pasteur, Université de Paris, CNRS UMR 3569, Molecular Genetics of RNA Viruses Unit, F-75015 Paris, France
- 6 Institut Pasteur, CNR Virus des infections respiratoires, F-75015 Paris, France.
- 7 Institut Pasteur, Université de Paris, CNRS UMR 3569, Virus and Immunity, F-75015 Paris, France
- 8 Divisions of Human Biology, Fred Hutchinson Cancer Research Center, Seattle, United States
- 9 Synthego Corporation, 3565 Haven Avenue, Menlo Park, CA 94025
- 10 UMR 1282 ISP, INRAE Centre Val de Loire, Nouzilly, France

\* these authors contributed equally to this work

### # Corresponding authors:

Ferdinand Roesch  
ORCID: 0000-0003-0702-7778  
Email: [ferdinand.roesch@inrae.fr](mailto:ferdinand.roesch@inrae.fr)  
Phone: +33 2 47 42 75 20

Marco Vignuzzi  
ORCID: 0000-0002-4400-771X  
Email: [marco.vignuzzi@pasteur.fr](mailto:marco.vignuzzi@pasteur.fr)  
Phone: 33 1 4568 8242

Nolwenn Jouvenet  
ORCID: 0000-0001-6103-6048  
Email: [nolwenn.jouvenet@pasteur.fr](mailto:nolwenn.jouvenet@pasteur.fr)  
Phone: 33 1 40 61 34 92

Sébastien Nisole  
ORCID: 0000-0001-9793-419X  
Email: [sebastien.nisole@inserm.fr](mailto:sebastien.nisole@inserm.fr)  
Phone: 33 4 3435 9454

## 1 **Abstract:**

2  
3 Interferon restricts SARS-CoV-2 replication in cell culture, but only a handful of Interferon  
4 Stimulated Genes with antiviral activity against SARS-CoV-2 have been identified. Here, we describe  
5 a functional CRISPR/Cas9 screen aiming at identifying SARS-CoV-2 restriction factors. We identified  
6 DAXX, a scaffold protein residing in PML nuclear bodies known to limit the replication of DNA viruses  
7 and retroviruses, as a potent inhibitor of SARS-CoV-2 and SARS-CoV replication in human cells.  
8 Basal expression of DAXX was sufficient to limit the replication of SARS-CoV-2, and DAXX over-  
9 expression further restricted infection. In contrast with most of its previously described antiviral  
10 activities, DAXX-mediated restriction of SARS-CoV-2 was independent of the SUMOylation pathway.  
11 SARS-CoV-2 infection triggered the re-localization of DAXX to cytoplasmic sites and promoted its  
12 degradation. Mechanistically, this process was mediated by the viral papain-like protease (PLpro) and  
13 the proteasome. Together, these results demonstrate that DAXX restricts SARS-CoV-2, which in turn  
14 has evolved a mechanism to counteract its action.

15  
16 **Introduction.** Severe Acute Respiratory Syndrome Coronavirus 2 (SARS-CoV-2) is the causative  
17 agent of COVID-19 and the third coronavirus to cause severe disease in humans after the emergence  
18 of SARS-CoV in 2002 and Middle East Respiratory Syndrome-related Coronavirus (MERS-CoV) in  
19 2012. Since the beginning of the pandemic, SARS-CoV-2 has infected more than 200 million people  
20 and claimed more than 4 million lives. While the majority of infected individuals experience mild (or no)  
21 symptoms, severe forms of COVID-19 are associated with respiratory failure, shock and pneumonia.  
22 Innate immune responses play a key role in COVID-19 pathogenesis: immune exhaustion (1) and  
23 reduced levels of type-I and type-III interferons (IFN) have been observed in the plasma of severe  
24 COVID-19 patients (2,3). Imbalanced immune responses to SARS-CoV-2, with a low and delayed IFN  
25 response coupled to early and elevated levels of inflammation, have been proposed to be a major  
26 driver of COVID-19 (4,5). Neutralizing auto-antibodies against type-I IFN (6) and genetic alterations in  
27 several IFN pathway genes (7) have also been detected in critically ill COVID-19 patients. These  
28 studies highlight the crucial need to characterize the molecular mechanisms by which IFN effectors  
29 may succeed, or fail, to control SARS-CoV-2 infection.

30 Although SARS-CoV-2 has been described to antagonize the IFN pathway by different  
31 mechanisms involving the viral proteins ORF3b, ORF9b ORF6, and Nsp15 (8), detection of SARS-  
32 CoV-2 by the innate immune sensor MDA5 (9,10) leads to the synthesis of IFN and expression of IFN  
33 Stimulated Genes (ISGs) in human airway epithelial cells (4). IFN strongly inhibits SARS-CoV-2  
34 replication when added in cell culture prior to infection (11,12) or when administered intranasally in  
35 hamsters (13), suggesting that some ISGs might have antiviral activity (14). Relatively few ISGs with  
36 antiviral activity against SARS-CoV-2, however, have been identified so far. For instance, spike-  
37 mediated viral entry and fusion is restricted by LY6E (15,16) and IFITMs (17,18). Mucins have also  
38 been suggested to restrict viral entry (19). ZAP, which targets CpG dinucleotides in RNA viruses, also  
39 restricts SARS-CoV-2, albeit moderately (20). OAS1 has been recently identified in an ISG  
40 overexpression screen to restrict SARS-CoV-2 replication, through the action of RNaseL, both in cell  
41 lines and in patients (21). Another overexpression screen identified 65 ISGs as potential inhibitors of  
42 SARS-CoV-2 (22), and found that BST-2/Tetherin is able to restrict viral budding, although this activity  
43 is counteracted by the viral protein ORF7a. We hypothesize that additional ISGs with antiviral activity  
44 against SARS-CoV-2 remain to be discovered. Other antiviral factors that are not induced by IFN may  
45 also inhibit SARS-CoV-2: for instance, the RNA helicase DDX42 restricts several RNA viruses,  
46 including SARS-CoV-2 (23). While several whole-genome CRISPR/Cas9 screens identified host  
47 factors required for SARS-CoV-2 replication (24–29), none focused on antiviral genes.

48 Here, we performed a CRISPR/Cas9 screen designed to identify restriction factors for SARS-  
49 CoV-2, assessing the ability of 1905 ISGs to modulate SARS-CoV-2 replication in human epithelial  
50 lung cells. We report that the Death domain-associated protein 6 (DAXX), a scaffold protein residing in  
51 PML nuclear bodies (30) and restricting DNA viruses (31) as well as retroviruses (32,33), is a potent  
52 inhibitor of SARS-CoV-2 replication. SARS-CoV-2 restriction by DAXX is largely independent of the  
53 action of IFN, and unlike most of its other known activities, of the SUMOylation pathway. Within hours

54 of infection, DAXX re-localizes to sites of viral replication in the cytoplasm, likely targeting viral  
55 transcription. We show that the SARS-CoV-2 papain-like protease (PLpro) induces the proteasomal  
56 degradation of DAXX, demonstrating that SARS-CoV-2 developed a mechanism to evade, at least  
57 partially, the restriction imposed by DAXX.

58

## 59 Results.

60

61 **A restriction factor-focused CRISPR/Cas9 screen identifies genes potentially involved in**  
62 **SARS-CoV-2 inhibition.** To identify restriction factors limiting SARS-CoV-2 replication, we generated  
63 a pool of A549-ACE2 cells knocked-out (KO) for 1905 potential ISGs, using the sgRNA library we  
64 previously developed to screen HIV-1 restriction factors (34). This library includes more ISGs than  
65 most published libraries, as the inclusion criteria was less stringent (fold-change in gene expression in  
66 THP1 cells, primary CD4+ T cells or PBMCs  $\geq 2$ ). Therefore, some genes present in the library may  
67 not be ISGs *per se* in A549 cells. Transduced cells were selected by puromycin treatment, treated with  
68 IFN $\alpha$  and infected with SARS-CoV-2. Infected cells were immuno-labelled with a spike (S)-specific  
69 antibody and analyzed by flow cytometry. As expected (11,12), IFN $\alpha$  inhibited infection by 7-fold (**Fig.**  
70 **S1**). Infected cells were sorted based on S expression (**Fig. 1a**), and DNA was extracted from infected  
71 and non-infected control cells. Integrated sgRNA sequences in each cell fraction were amplified by  
72 PCR and sequenced by Next Generation Sequencing (NGS). Statistical analyses using the MAGeCK  
73 package (35) led to the identification of sgRNAs significantly enriched or depleted in infected cells  
74 representing antiviral and proviral factors, respectively (**Fig. 1b**). Although our screen was not  
75 designed to explicitly study proviral factors, we did successfully identify the well-described SARS-CoV-  
76 2 co-factor cathepsin L (CTSL) (36), validating our approach. USP18, a negative regulator of the IFN  
77 signaling pathway (37), and ISG15, which favors Hepatitis C Virus replication (38), were also identified  
78 as proviral ISGs. Core IFN pathway genes such as the IFN receptor (IFNAR1), STAT1, and STAT2,  
79 were detected as antiviral factors, further validating our screening strategy. LY6E, a previously  
80 described inhibitor of SARS-CoV-2 entry (15,16), was also a significant hit. Moreover, our screen  
81 identified APOL6, IFI6, DAXX and HERC5, genes that are known to encode proteins with antiviral  
82 activity against other viruses (39–42), but had not previously been studied in the context of SARS-  
83 CoV-2 infection. For all these genes except APOL6, individual sgRNAs were consistently enriched (for  
84 antiviral factors) or depleted (for proviral factors) in the sorted population of infected cells, while non-  
85 targeting sgRNAs were not (**Fig. 1c**).

86

87 **LY6E and DAXX display antiviral activity against SARS-CoV-2.** To validate the ability of the  
88 identified hits to modulate SARS-CoV-2 replication in human cells, we generated pools of A549-ACE2  
89 knocked-out (KO) cells for different genes of interest by electroporating a mix of 3 sgRNA/Cas9  
90 ribonucleoprotein (RNP) complexes per gene target. Levels of gene editing were above 80% in all of  
91 the A549-ACE2 KO cell lines, as assessed by sequencing of the edited *loci* (**Table 1**). As controls, we  
92 used cells KO for IFNAR1, for the proviral factor CTSL or for the antiviral factor LY6E, as well as cells  
93 electroporated with non-targeting (NTC) sgRNAs/Cas9 RNPs. These different cell lines were then  
94 treated with IFN $\alpha$  and infected with SARS-CoV-2. Viral replication was assessed by measuring the  
95 levels of viral RNA in the supernatant of infected cells using RT-qPCR (**Fig. 2a**). In parallel, we titrated  
96 the levels of infectious viral particles released into the supernatant of infected cells (**Fig. 2b**). As  
97 expected, infection was significantly reduced in CTSL KO cells, confirming the proviral effect of this  
98 gene (36). Among the selected antiviral candidate genes, only 2 had a significant impact on SARS-  
99 CoV-2 replication: LY6E (as expected), and to an even greater degree, DAXX. Both genes restricted  
100 replication in absence of IFN $\alpha$ , an effect which was detectable at the level of viral RNA (8-fold and 42-  
101 fold reduction of infection, respectively, **Fig. 2a**) and of infectious virus (15-fold and 62-fold reduction,  
102 **Fig. 2b**). Based on available single-cell RNAseq datasets (43), DAXX is expected to be expressed in  
103 cell types physiologically relevant for SARS-CoV-2 infection such as lung epithelial cells and  
104 macrophages (**Fig. S2**).

105 In IFN $\alpha$ -treated cells, DAXX and LY6E KO led to a modest, but significant rescue of viral  
106 replication, which was particularly visible when measuring the levels of infectious virus by plaque

107 assay titration (**Fig. 2b**), while the antiviral effect of IFN $\alpha$  treatment was completely abrogated in  
108 IFNAR1 KO cells, as expected (**Fig. 2c**). However, IFN $\alpha$  still had robust antiviral effect on SARS-CoV-  
109 2 replication in both DAXX KO and LY6E KO cells (**Fig. 2c**). While DAXX and LY6E contribute to the  
110 IFN-mediated restriction, this suggests that there are likely other ISGs contributing to this effect. DAXX  
111 is sometimes referred to as an ISG, and was originally included in our ISG library, although its  
112 expression is only weakly induced by IFN in some human cell types (32,44). Consistent with this, we  
113 found little to no increase in DAXX expression in IFN $\alpha$ -treated A549-ACE2 cells (**Fig. S3**). In addition,  
114 we tested the antiviral effect of DAXX on several SARS-CoV-2 variants that have been suggested to  
115 be partially resistant to the antiviral effect of IFN in A549-ACE2 cells (45). Our results confirmed that  
116 Lineage B.1.1.7. (Alpha) and Lineage P1 (Gamma) SARS-CoV-2 variants were indeed less sensitive  
117 to IFN (**Fig. 2d**). DAXX, however, restricted all variants to a similar level than the original Lineage B  
118 strain of SARS-CoV-2 (**Fig. 2d**), suggesting that while some variants may have evolved towards IFN-  
119 resistance, they are still efficiently restricted by DAXX. To determine whether DAXX is specific to  
120 SARS-CoV-2 or also inhibits other RNA viruses, including coronaviruses, we infected A549-ACE2 WT  
121 and DAXX KO cells with SARS-CoV, MERS-CoV, and 2 RNA viruses belonging to unrelated viral  
122 families: Yellow Fever Virus (YFV) and Measles Virus (MeV), which are positive and negative strand  
123 RNA viruses, respectively. Our results show that DAXX restricts SARS-CoV, but has no effect on the  
124 replication of YFV, MeV or MERS-CoV (**Fig. 2e-f**). Thus, our data suggests that DAXX restriction may  
125 exhibit some level of specificity.

126  
127 **DAXX targets SARS-CoV-2 transcription.** Next, we investigated whether DAXX targets early steps  
128 of the SARS-CoV-2 viral life cycle such as viral entry or transcription. The intracellular levels of two  
129 viral transcripts were assessed at different time post-infection in A549-ACE2 WT or DAXX KO cells  
130 (**Fig. 3**). At early time points (from 2h to 6h p.i.), the levels of viral RNA were similar in WT and DAXX  
131 KO cells, suggesting that comparable amounts of SARS-CoV-2 virions were entering cells. The levels  
132 of viral transcripts significantly increased starting at 8h p.i., representing the initiation of viral  
133 transcription. The levels of the 5' UTR viral transcript (**Fig. 3a**) were 6.4-fold higher at 8h; 4.1-fold  
134 higher at 10h; and 8-fold higher at 24h post-infection in DAXX KO cells compared to WT cells. The  
135 levels of RdRp transcripts were less affected by the absence of DAXX than 5'UTR transcripts (**Fig. 3b**)  
136 with levels of viral transcripts 1.7-fold and 3.5-fold higher in DAXX KO cells compared to WT cells at  
137 10h and 24h pos-infection, respectively. These results suggest that DAXX acts early during the SARS-  
138 CoV-2 replication cycle, likely targeting the step of viral transcription.

139  
140 **DAXX restriction is SUMO-independent.** DAXX is a small scaffold protein that acts by recruiting  
141 other SUMOylated proteins in nuclear bodies through its C-terminal SUMO-Interacting Motif (SIM)  
142 domain (46). The recruitment of these factors is required for the effect of DAXX on various cellular  
143 processes such as transcription and apoptosis, and on its antiviral activities (32,47–49). DAXX can  
144 also be SUMOylated itself (50), which may be important for some of its functions. To investigate the  
145 role of SUMOylation in DAXX-mediated SARS-CoV-2 restriction, we used overexpression assays to  
146 compare the antiviral activity of DAXX WT with two previously described DAXX mutants (51). First, we  
147 used a version of DAXX in which 15 lysine residues have been mutated to arginine (DAXX 15KR),  
148 which is unable to be SUMOylated; and second, a truncated version of DAXX that is missing its C-  
149 terminal SIM domain (DAXX $\Delta$ SIM) (48) and is unable to interact with its SUMOylated partners. A549-  
150 ACE2 were refractory to SARS-CoV-2 infection upon transfection with any plasmid, precluding us from  
151 using this cell line. Instead, we transfected 293T-ACE2 cells, another SARS-CoV-2 permissive cell line  
152 (18).

153 We examined the effect of DAXX WT overexpression on the replication of SARS-CoV-2-  
154 mNeonGreen (52) by microscopy. DAXX overexpression starkly reduced the number of infected cells  
155 (**Fig. 4a-b**), revealing that DAXX-mediated restriction is not specific to A549-ACE2 cells. Using double  
156 staining for HA-tagged DAXX and SARS-CoV-2, we found that most of the DAXX-transfected cells  
157 were negative for infection, and conversely, that most of the infected cells did not express transfected  
158 DAXX (**Fig. 4c**), indicating that DAXX imposes a major block to SARS-CoV-2 infection.



159 In order to quantify the antiviral effect of overexpressed DAXX WT and mutants, we assessed the  
160 number of cells positive for the S protein (among transfected cells) by flow cytometry and the  
161 abundance of viral transcripts by qRT-PCR. Western blot (**Fig. S4a**) and flow cytometry (**Fig. S4b**)  
162 analyses showed that DAXX WT and mutants were expressed at similar levels, with a transfection  
163 efficiency of around 40 to 50% for all three constructs. DAXX WT, 15KR and  $\Delta$ SIM all efficiently  
164 restricted SARS-CoV-2 replication. Indeed, at 24 hours p.i., the proportion of infected cells (among  
165 HA-positive cells) was reduced by 2 to 3-fold as compared to control transfected cells for all 3  
166 constructs (**Fig. 4d**). This effect was less pronounced but still significant at 48 hours p.i. (**Fig. 4e**).  
167 Moreover, DAXX overexpression led to a significant reduction of the levels of two different viral  
168 transcripts (**Fig. S5**), in line with our earlier results showing that DAXX targets viral transcription (**Fig.**  
169 **3a-b**). Together, these results show that DAXX overexpression restricts SARS-CoV-2 replication in a  
170 SUMOylation-independent mechanism.

171  
172 **SARS-CoV-2 infection triggers DAXX re-localization.** DAXX mostly localizes in nuclear bodies (30),  
173 whereas SARS-CoV-2 replication occurs in the cytoplasm. We reasoned that DAXX localization may  
174 be altered during the course of infection in order for the restriction factor to exert its antiviral effect. To  
175 test this hypothesis, we infected 293T-ACE2 cells with SARS-CoV-2 and used high-resolution  
176 confocal microscopy to study the localization of endogenous DAXX (**Fig. 5**). As expected (30), DAXX  
177 mostly localizes in the nuclei of non-infected cells, forming discrete *foci*. At 6h post-infection, DAXX re-  
178 localizes to the cytoplasm, although nuclear *foci* can still be detected. At 24h post-infection, DAXX is  
179 completely depleted from nuclear bodies, and is found almost exclusively in the cytoplasm of infected  
180 cells, in close association with in close association with dsRNAs, likely representing SARS-CoV-2 viral  
181 dsRNAs. These results suggest that early events following SARS-CoV-2 infection trigger the re-  
182 localization of DAXX from the nucleus to the cytoplasm.

183  
184 **SARS-CoV-2 PLpro induces proteasomal degradation of DAXX.** Next, we asked whether this  
185 relocalization of DAXX following infection destabilizes the protein. Western blot analysis revealed that  
186 SARS-CoV-2 infection induces a marked decrease of total DAXX expression in infected cells (**Fig.**  
187 **6a**). In contrast, SARS-CoV-2 infection had no effect on DAXX mRNA levels (**Fig. S6**). Importantly, the  
188 decrease in DAXX protein levels is likely not attributed to a global host cell shut down, as the levels of  
189 Lamin B, HSP90, Actin, GAPDH, Tubulin, TRIM22 and RIG-I were unchanged following infection (**Fig.**  
190 **6a**). These results suggest that DAXX may be actively and specifically targeted by SARS-CoV-2 for  
191 degradation during the course of infection. SARS-CoV-2 papain-like protease (PLpro) is a possible  
192 candidate for this activity, as it cleaves other cellular proteins such as ISG15 (53,54), and ULK1 (55). It  
193 was also shown that foot-and-mouth disease virus (FDMV) PLpro degrades DAXX (56). Thus, we  
194 treated cells with different inhibitors: GRL0617, an inhibitor of SARS-CoV-2 PLpro (54); MG132, a  
195 well-described proteasome inhibitor; or Masitinib, an inhibitor of SARS-CoV-2 3CL protease (57).  
196 These inhibitors had minimal effects on cell viability at the selected concentrations (**Fig. S7**).  
197 Strikingly, GRL0617 treatment partially restored DAXX expression (**Fig. 6b**), especially at the highest  
198 concentration. Similarly, MG132 also prevented DAXX degradation in SARS-CoV-2 infected cells. In  
199 contrast, Masitinib treatment had no effect on DAXX levels. These results suggest that PLpro, but not  
200 3CL, targets DAXX for proteasomal degradation. Consistently, GRL0617 treatment also restored  
201 DAXX subcellular localization to nuclear bodies (**Fig. 6c**). As expected, GRL0617 treatment also  
202 inhibited the production of SARS-CoV-2 proteins such as spike (**Fig. 6b**), and may thus have an  
203 indirect effect on DAXX by inhibiting SARS-CoV-2 replication itself. However, the fact that Masitinib  
204 also inhibits spike production but does not restore DAXX expression suggested that DAXX  
205 degradation is not an unspecific consequence of viral replication but rather a specific activity of PLpro.  
206 To investigate the potential direct contribution of PLpro to DAXX degradation, we assessed the impact  
207 of overexpressing individual SARS-CoV-2 proteins in 293T-ACE2 cells on DAXX levels. We included  
208 in the analysis mCherry-tagged SARS-CoV-2 Non-structural proteins (Nsp) (58), which are not  
209 expressed from a lentiviral vector that may be targeted by DAXX antiviral activity (33). This included  
210 Nsp3 (which encodes PLro), Nsp4, Nsp6, Nsp7, Nsp10, Nsp13 and Nsp14. All proteins were  
211 expressed at similar levels (**Fig. S8a**). Only the overexpression of Nsp3 led to DAXX degradation (**Fig.**

212 **6d**). This effect was dose-dependent (**Fig. 6e and Fig. S8b**), and was abrogated when cells were  
213 treated with GRL0617 (**Fig. 6f**). Taken together, these results strongly indicate that PLpro directly  
214 induces the proteasomal degradation of DAXX.

215

## 216 **Discussion.**

217

218 **Comparison with other screens.** The whole-genome CRISPR/Cas9 screens conducted to date on  
219 SARS-CoV-2 infected cells mostly identified host factors necessary for viral replication (24–29) and  
220 did not focus on antiviral genes, as did our screen. Three overexpression screens, however, identified  
221 ISGs with antiviral activity against SARS-CoV-2 (16,22,21). In the first one, Pfaender *et al.* screened  
222 386 ISGs for their antiviral activity against the endemic human coronavirus 229E, and identified LY6E  
223 as a restriction factor inhibiting both 229E and SARS-CoV-2. Our screen also identified LY6E as a top  
224 hit (**Fig.1**), further validating the findings of both studies. Four additional genes had significant p-  
225 values in both Pfaender *et al.* and our work: IFI6, HERC5, OAS2 and SPSB1 (**Table S5-S6**). We  
226 showed that knocking-out LY6E and DAXX only partially rescued SARS-CoV-2 replication in IFN-  
227 treated cells (**Fig. 2**), suggesting that other IFN effectors active against SARS-CoV-2 remain to be  
228 identified. For instance, other ISGs, such as IFITMs, inhibit SARS-CoV-2 viral entry (17–19). In the  
229 second screen, Martin Sancho *et al.* tested 399 ISGs against SARS-CoV-2. Among the 65 antiviral  
230 ISGs identified, they focused on BST-2/Tetherin, which targets viral budding. BST-2/Tetherin was not  
231 a significant hit in our screen (**Table S5-6**). This discrepancy is likely due to the fact that our screen  
232 relies on the sorting of S-positive cells, and is therefore unable to detect factors restricting the late  
233 stages of the viral replication cycle. The most recent overexpression screen assessed the contribution  
234 of 539 human and 444 macaque ISGs in SARS-CoV-2 restriction, and further characterized the role of  
235 OAS1 in sensing SARS-CoV-2 and restricting its replication through RNaseL. While we did not identify  
236 OAS1 or RNaseL in our screen (**Table S5-6**), we did identify hits in common with this screen,  
237 including IFI6 and OAS2 (that were also identified by Pfaender *et al.*). Of note, DAXX was absent from  
238 the ISG libraries used by these overexpression screens, which explains why it was not previously  
239 identified as an antiviral gene for SARS-CoV-2. Our sgRNA library, by including 1905 genes, targeted  
240 a wider set of ISGs and “ISG-like” genes, including genes like DAXX that are not (or only weakly)  
241 induced by IFN in some cell types (32,44). Interestingly, IFN has a stronger effect on DAXX  
242 expression levels in cells from other mammals such as bats (59). Future studies may investigate  
243 whether DAXX orthologs of different species are also able to restrict SARS-CoV-2 and whether DAXX  
244 participates in IFN-mediated viral restriction in these species.

245

246 **DAXX is a restriction factor for SARS-CoV-2.** We identify DAXX as a potent antiviral factor  
247 restricting the replication of SARS-CoV-2, acting independently of IFN and likely targeting an early  
248 step of the viral life cycle such as transcription (**Fig. 3**). DAXX fulfills all of the criteria defining a *bona*  
249 *fi*de SARS-CoV-2 restriction factor: knocking-out endogenous DAXX leads to enhanced viral  
250 replication (**Fig. 2**), while over-expression of DAXX restricts infection (**Fig. 4**). DAXX co-localizes with  
251 viral dsRNAs (**Fig. 5**) and SARS-CoV-2 antagonizes DAXX to some extent, as evidenced by the  
252 proteasomal degradation of DAXX induced by PLpro (**Fig. 6**). Although DAXX expression is not  
253 upregulated by IFN $\alpha$  in A549 cells (**Fig. S3**), basal levels of expression are sufficient for its antiviral  
254 activity, as has been shown for other potent restriction factors. Publicly available single-cell RNAseq  
255 analyses (**Fig. S2**) indicated that DAXX is expressed in cell types targeted by the virus *in vivo*, such as  
256 lung epithelial cells and macrophages. Interestingly, DAXX exhibited some degree of specificity in its  
257 antiviral activity, as unrelated viruses such as YFV and MeV, as well as the closely related MERS-CoV  
258 were not sensitive to its action, in contrast to SARS-CoV and SARS-CoV-2 (**Fig. 2**). Future work will  
259 determine which viral determinants are responsible for this specific antiviral activity of DAXX.

260

261 **Mechanism of DAXX-mediated restriction.** DAXX is mostly known for its antiviral activity against  
262 DNA viruses replicating in the nucleus, such as adenovirus 5 (AdV5) (60) and human papillomavirus  
263 (HPV) (61). Most of these viruses antagonize PML and/or DAXX, which interacts with PML in nuclear  
264 bodies (30). We show here that DAXX is also able to restrict SARS-CoV-2, a positive sense RNA virus

265 that replicates in the cytoplasm. Recent studies have shown that DAXX inhibits the reverse  
266 transcription of HIV-1 in the cytoplasm (32,33). Within hours of infection, DAXX subcellular localization  
267 was altered, with DAXX accumulating in the cytoplasm and colocalizing with incoming HIV-1 capsids  
268 (33). Here, we observed a similar phenomenon, with a rapid re-localization of DAXX from the nucleus  
269 to cytoplasmic viral replication sites (**Fig. 5**), where it likely exerts its antiviral effect. Early events in the  
270 replication cycle of both HIV-1 and SARS-CoV-2, such as viral fusion or virus-induced stress, may  
271 thus trigger DAXX re-localization to the cytoplasm. DAXX seems to inhibit SARS-CoV-2 by a distinct  
272 mechanism: whereas the recruitment of interaction partners through the SIM-domain is required for  
273 the effect of DAXX on HIV-1 reverse transcription (32), it was not the case in the context of SARS-  
274 CoV-2 restriction. This result was unexpected, since DAXX has no enzymatic activity and rather acts  
275 as a scaffold protein recruiting SUMOylated partners through its SIM domain (51). Some DAXX  
276 functions, such as interaction with the chromatin remodeler ATRX (30) or its recently described role as  
277 a chaperone protein (62) are, however, SIM-independent. Future work should determine which DAXX  
278 domains and residues are required for its antiviral activity.

280 **Antagonism of DAXX by SARS-CoV-2.** Our results suggest that SARS-CoV-2 developed a  
281 mechanism to antagonize DAXX restriction, with PLpro inducing its degradation to the proteasome  
282 (**Fig. 6**). his antagonism, however, is only partial, since knocking-out DAXX still enhances SARS-CoV-  
283 2 replication (**Fig. 2**). Another possibility is that DAXX, by acting early in the viral life cycle (i.e. as soon  
284 as 8 hours p.i., **Fig. 3**) may exert its antiviral effect before PLpro is able to complete its degradation.  
285 Proteins expressed by other viruses are also able to degrade DAXX: for instance, the AdV5 viral factor  
286 E1B-55K targets DAXX for proteasomal degradation (60), and FDMV PLpro cleaves DAXX (56). We  
287 showed in **Fig. 2** that SARS-CoV, but not MERS-CoV, is sensitive to DAXX. Thus, it will be interesting  
288 to test whether PLpro from these different coronaviruses differ in their ability to degrade DAXX, and  
289 whether this has an impact on their sensitivity to DAXX restriction. Future research may also establish  
290 whether PLpro induces the degradation of DAXX through direct cleavage, or whether it acts in a more  
291 indirect way, such as cleaving or recruiting cellular co-factors. Such investigations may be relevant for  
292 the development of PLpro inhibitors (63): indeed, in addition to directly blocking SARS-CoV-2  
293 replication, PLpro inhibitors may also sensitize the virus to existing antiviral mechanisms such as  
294 DAXX restriction.

## 296 **Material & Methods.**

297  
298 **Cells, viruses & plasmids.** HEK 293T (ATCC #CRL-11268) were cultured in MEM (Gibco #11095080)  
299 complemented with 10% FBS (Gibco #A3160801) and 2 mM L-Glutamine (Gibco # 25030081). VeroE6 (ATCC  
300 #CRL-1586), A549 (ATCC #CCL-185) and HEK 293T, both overexpressing the ACE2 receptor (A549-ACE2 and  
301 HEK 293T-ACE2, respectively), were grown in DMEM (Gibco #31966021) supplemented with 10% FBS (Gibco  
302 #A3160801), and penicillin/streptomycin (100 U/mL and 100 µg/mL, Gibco # 15140122). Blastidicin (10 µg/mL,  
303 Sigma-Aldrich #SBR00022-10ML) was added for selection of A549-ACE2 and HEK 293T-ACE2. All cells were  
304 maintained at 37°C in a 5% CO<sub>2</sub> atmosphere. Universal Type I Interferon Alpha (PBL Assay Science #11200-2)  
305 was diluted in sterile-filtered PBS 1% BSA according to the activity reported by the manufacturer. The strains  
306 BetaCoV/France/IDF0372/2020 (Lineage B); hCoV-19/France/IDF-IPP11324/2020 (Lineage B.1.1.7); and hCoV-  
307 19/France/PDL-IPP01065/2021 (Lineage B.1.351) were supplied by the National Reference Centre for  
308 Respiratory Viruses hosted by Institut Pasteur and headed by Pr. Sylvie van der Werf. The human samples from  
309 which the lineage B, B.1.1.7 and B.1.351 strains were isolated were provided by Dr. X. Lescure and Pr. Y.  
310 Yazdanpanah from the Bichat Hospital, Paris, France; Dr. Besson J., Bioliance Laboratory, saint-Herblain  
311 France; Dr. Vincent Foissaud, HIA Percy, Clamart, France, respectively. These strains were supplied through  
312 the European Virus Archive goes Global (Evag) platform, a project that has received funding from the European  
313 Union's Horizon 2020 research and innovation programme under grant agreement #653316. The hCoV-  
314 19/Japan/TY7-501/2021 strain (Lineage P1) was kindly provided by Jessica Vanhomwegen (Cellule  
315 d'Intervention Biologique d'Urgence; Institut Pasteur). The mNeonGreen reporter SARS-CoV-2 was provided by  
316 Pei-Yong Shi (52). SARS-CoV FFM-1 strain (64) was kindly provided by H.W. Doerr (Institute of Medical  
317 Virology, Frankfurt University Medical School, Germany). The Middle East respiratory syndrome (MERS)  
318 Coronavirus, strain IP/COV/MERS/Hu/France/FRA2 (Genbank reference [KJ361503](https://doi.org/10.1093/nar/kj361503)) isolated from one of the  
319 French cases (65) was kindly provided by Jean-Claude Manuguerra (Cellule d'Intervention Biologique



320 d'Urgence; Institut Pasteur). SARS-CoV-2 viral stocks were generated by infecting VeroE6 cells (MOI 0.01,  
321 harvesting at 3 dpi) using DMEM supplemented with 2% FBS and 1 µg/mL TPCK-trypsin (Sigma-Aldrich #1426-  
322 100MG). SARS-CoV and MERS-CoV viral stocks were generated by infecting VeroE6 cells (MOI 0.0001) using  
323 DMEM supplemented with 5% FCS and harvesting at 3 dpi or 6 dpi, respectively. The Yellow Fever Virus (YFV)  
324 Asibi strain was provided by the Biological Resource Center of the Institut Pasteur. The Measles Schwarz strain  
325 expressing GFP (MeV-GFP) was described previously (70). Both viral stocks were produced on Vero NK cells.  
326 The Human Interferon-Stimulated Gene CRISPR Knockout Library was a gift from Michael Emerman and is  
327 available on Addgene (Pooled Library #125753). The plentiCRISPRv.2 backbone was ordered through Addgene  
328 (Plasmid #52961). pMD2.G and psPAX2 were gifts from Didier Trono (Addgene #12259; #12260). pcDNA3.1  
329 was purchased from Invitrogen. Plasmids constructs expressing WT and mutant HA-tagged DAXX constructs  
330 were kindly provided by Hsiu-Ming Shih (51). The plasmids encoding mCherry-tagged viral proteins were a gift  
331 from Bruno Antony and ordered through Addgene: Nsp3 -mCherry (#165131); Nsp4-mCherry (#165132); Nsp6-  
332 mCherry (#165133); Nsp7-mCherry (#165134); Nsp10-mCherry (#165135); Nsp13-mCherry (#165136); Nsp14-  
333 mCherry (#165137).  
334

335 **Antibodies.** For Western Blot, we used mouse anti-DAXX (diluted 1:1000, Abnova #7A11), rat anti-HA clone  
336 3F10 (diluted 1:3000, Sigma #2158167001), mouse anti-GAPDH clone 6C5 (diluted 1:3000, Millipore  
337 #FCMAB252F), Goat anti-Lamin B clone M-20 (diluted 1:500, Santa Cruz sc-6217), mouse monoclonal  
338 HSP90α/β clone F-8 (diluted 1 :500, Santa Cruz sc-13119), mouse monoclonal β-actin clone AC-15 (1:3000  
339 Sigma #A1978), mouse monoclonal α-Tubulin clone DMA1 (diluted 1:1000, Sigma #T9026), rabbit anti-TRIM22  
340 (diluted 1 :1000, Proteintech #13744-1-AP) and mouse Monoclonal RIG-I clone Alme-1 (diluted 1: 1000,  
341 adipoGen #AG-20B-0009). To detect SARS-CoV-2 Spike protein, we used mouse anti-spike clone 1A9 (diluted  
342 1:1000, GeneTex GTX632604). Secondary antibodies were goat anti-mouse and anti-rabbit HRP-conjugates  
343 (diluted 1:5000, ThermoFisher #31430 and #31460) and horse anti-goat HRP (diluted 1: 1000, Vector # PI-  
344 9500). For immunofluorescence, we used rabbit anti-DAXX (diluted 1:50, Proteintech #20489-1-AP) and mouse  
345 anti-dsRNA J2 (diluted 1:50, Scicons #10010200). Secondary antibodies were goat anti-rabbit AF555 and anti-  
346 mouse AF488 (diluted 1:1000, ThermoFisher #A-21428 and #A-28175). For flow sorting of infected cells, we  
347 used the anti-S2 H2 162 antibody (diluted 1:150), a kind gift from Dr. Hugo Mouquet, (Institut Pasteur, Paris,  
348 France). Secondary antibody was donkey anti-mouse AF647 (diluted 1:1000, Invitrogen #A31571). For FACS  
349 analysis, we used rat anti-HA clone 3F10 (diluted 1:100, Sigma #2158167001) and mouse anti-dsRNA J2  
350 (diluted 1:500, Scicons #10010200). Secondary antibodies were goat anti-rat AF647 and anti-mouse AF488  
351 (diluted 1:1000, ThermoFisher #A-21247 #A-28175). The pan-flavivirus anti-Env 4G2 antibody was a kind gift  
352 from Phillipe Desprès.  
353

354 **Generation of CRISPR/Cas9 library cells.** HEK 293T cells were transfected with the sgRNA library plasmid  
355 together with plasmids coding for Gag/Pol (R8.2) and for the VSVg envelope (pVSVg) using a ratio of 5:5:1 and  
356 calcium phosphate transfection. Supernatants were harvested at 36h and 48h, concentrated 80-fold by  
357 ultracentrifugation (22,000 g, 4°C for 1h) and pooled. To generate the ISG KO library cells, 36x10<sup>6</sup> A549-ACE2  
358 cells were seeded in 6 well plates (10<sup>6</sup> cells per well) 24h before transduction. For each well, 100 µL of  
359 concentrated lentivector was diluted in 500 µL of serum-free DMEM, supplemented with 10 µg/mL of DEAE  
360 dextran (Sigma #D9885). After 48h, transduced cells were selected by puromycin treatment for 20 days (1  
361 µg/mL; Sigma #P8833).  
362

363 **CRISPR/Cas9 screen.** 4x10<sup>7</sup> A549-ACE2 cells were treated with IFNα (200U/mL). 16h later, cells were infected  
364 at a MOI of 1 in serum-free media complemented with TPCK-trypsin and IFNα (200 U/mL). After 90 min, the viral  
365 inoculum was removed, and cells were maintained in DMEM containing 5% FBS and IFNα (200 U/mL). After  
366 24h, cells were harvested and fixed for 15 min in Formalin 1%. Fixed cells were washed in cold FACS buffer  
367 containing PBS, 2% Bovine Serum Albumin (Sigma-Aldrich #A2153-100G), 2 mM EDTA (Invitrogen #15575-  
368 038) and 0.1% Saponin (Sigma-Aldrich #S7900-100G). Cells were incubated for 30 min at 4°C under rotation  
369 with primary antibody diluted in FACS buffer. Incubation with the secondary antibody was performed during 30  
370 min at 4°C under rotation. Stained cells were resuspended in cold sorting buffer containing PBS, 2% FBS, 25  
371 mM Hepes (Sigma-Aldrich #H0887-100ML) and 5 mM EDTA. Infected cells were sorted on a BD FACS Aria  
372 Fusion. Sorted and control (non-infected, not IFN-treated) cells were centrifugated (20 min, 2,000g) and  
373 resuspended in lysis buffer (NaCl 300 mM, SDS 0.1%, EDTA 10 mM, EGTA 20 mM, Tris 10 mM) supplemented  
374 with 1% Proteinase K (Qiagen #19133) and 1% RNase A/T1 (ThermoFisher #EN0551) and incubated overnight  
375 at 65°C. Two consecutive phenol-chloroform (Sigma #P3803-100ML) extractions were performed and DNA was  
376 recovered by ethanol precipitation. Nested PCR was performed using the Herculase II Fusion DNA Polymerase  
377 (Agilent, #600679) and the DNA oligos indicated in **Table S1**. PCR1 products were purified using QIAquick PCR



378 Purification kit (Qiagen #28104). PCR2 products were purified using Agencourt AMPure XP Beads (Beckman  
379 Coulter Life Sciences #A63880). DNA concentration was determined using Qubit dsDNA HS Assay Kit (Thermo  
380 Fisher #Q32854) and adjusted to 2 nM prior to sequencing. NGS was performed using the NextSeq 500/550  
381 High Output Kit v2.5 75 cycles (Illumina #20024906).

382  
383 **Screen analysis.** Reads were demultiplexed using bcl2fastq Conversion Software v2.20 (Illumina) and  
384 fastx\_toolkit v0.0.13. Sequencing adapters were removed using cutadapt v1.9.1 (66). The reference library was  
385 built using bowtie2 v2.2.9 (67). Read mapping was performed with bowtie2 allowing 1 seed mismatch in --local  
386 mode and samtools v1.9 (68). Mapping analysis and gene selection were performed using MAGeCK v0.5.6,  
387 normalizing the data with default parameters. sgRNA and gene enrichment analyses are available in **Table S5-**  
388 **S6**, respectively and full MAGeCK output at [https://github.com/Simon-LoriereLab/crispr\\_isg\\_sarscov2](https://github.com/Simon-LoriereLab/crispr_isg_sarscov2).

389  
390 **Generation of multi-guide gene knockout cells.** 3 sgRNAs per gene were designed (**Table S2**). 10 pmol of  
391 NLS-Sp.Cas9-NLS (SpCas9) nuclease (Aldevron #9212) was combined with 30 pmol total synthetic sgRNA (10  
392 pmol for each sgRNA) (Synthego) to form RNPs in 20  $\mu$ L total volume with SE Buffer (Lonza #V5SC-1002). The  
393 reaction was incubated at room temperature for 10 min.  $2 \times 10^5$  cells per condition were pelleted by centrifugation  
394 at 100g for 3 min, resuspended in SE buffer and diluted to  $2 \times 10^4$  cells/ $\mu$ L. 5  $\mu$ L of cell solution was added to the  
395 pre-formed RNP solution and gently mixed. Nucleofections were performed on a Lonza HT 384-well nucleofector  
396 system (Lonza #AAU-1001) using program CM-120. Immediately following nucleofection, each reaction was  
397 transferred to a 96-well plate containing 200  $\mu$ L of DMEM 10% FBS ( $5 \times 10^4$  cells per well). Two days post-  
398 nucleofection, DNA was extracted using DNA QuickExtract (Lucigen #QE09050). Cells were lysed in 50  $\mu$ L of  
399 QuickExtract solution and incubated at 68°C for 15 min followed by 95°C for 10 min. Amplicons were generated  
400 by PCR amplification using NEBNext polymerase (NEB #M0541) or AmpliTaq Gold 360 polymerase  
401 (ThermoFisher #4398881) and the primers indicated in **Table S3**. PCR products were cleaned-up and analyzed  
402 by Sanger sequencing. Sanger data files and sgRNA target sequences were input into Inference of CRISPR  
403 Edits (ICE) analysis <https://ice.synthego.com/#/> to determine editing efficiency and to quantify generated indels  
404 (69). Percentage of alleles edited is shown in **Table 1** (n=3).

405  
406 **SARS-CoV-2, SARS-CoV and MERS-CoV infection assays.** A549-ACE2 cells were infected by incubating the  
407 virus for 1h with the cells maintained in DMEM supplemented with 1  $\mu$ g/ml TPCK-trypsin (Sigma #4370285). The  
408 viral input was then removed and cells were kept in DMEM supplemented with 2% FBS. For 293T-ACE2 cells,  
409 infections were performed without TPCK-trypsin. MERS-CoV and SARS-CoV infections were performed in  
410 DMEM supplemented with 2% FBS and cells were incubated 1h at 37°C 5% CO<sub>2</sub>. Viral inoculum was then  
411 removed and replaced by fresh DMEM supplemented with 2% FBS. All experiments involving infectious material  
412 were performed in Biosafety Level 3 facilities in compliance with Institut Pasteur's guidelines and procedures.

413  
414 **Yellow Fever Virus and Measles Virus infection assays.** Cells were infected with YFV (at an MOI of 0.3) or  
415 MeV-GFP (MOI of 0.2) in DMEM without FBS for 2h in small volume of medium to enhance contacts with the  
416 inoculum and the cells. After 2h, the viral inoculum was replaced with fresh DMEM 10% FBS 1% P/S. FACS  
417 analysis were performed at 24h p.i. Cells were fixed and permeabilized using BD Cytofix/Cytoperm (Fisher  
418 Scientific, # 15747847) for 30 min on ice (all the following steps were performed on ice and centrifuged at 4°C)  
419 and then washed three times with wash buffer. Cells infected with YFV were incubated with the pan-flavivirus anti-  
420 Env 4G2 antibody for 1h at 4°C and then with Alexa 488 anti-mouse IgG secondary antibodies (Thermo Fisher,  
421 #A28175) for 45 min at 4°C in the dark. Non-infected, antibody-stained samples served as controls for signal  
422 background. The number of cells infected with MeV-GFP were assessed with the GFP signal, using non-infected  
423 cells as controls. Data were acquired with an Attune NxT Acoustic Focusing Cytometer (Life technologies) and  
424 analyzed using FlowJo software.

425  
426 **Hit validation.**  $2.5 \times 10^4$  A549-ACE2 KO cells were seeded in 96-well plates 18h before the experiment. Cells  
427 were treated with IFN $\alpha$  and infected as described above. At 72h post-infection, supernatants and cellular  
428 monolayers were harvested in order to perform qRT-PCR and plaque assay titration. Infectious supernatants  
429 were heat-inactivated at 80°C for 10 min. For intracellular RNA, cells were lysed in a mixture of Trizol Reagent  
430 (Invitrogen #15596018) and PBS at a ratio of 3:1. Total RNA was extracted using the Direct-zol 96 RNA kit  
431 (Zymo Research #R2056) or the Direct-zol RNA Miniprep kit (Zymo Research #R2050). For SARS-CoV-2  
432 detection, qRT-PCR was performed either directly on the inactivated supernatants or on extracted RNA using  
433 the Luna Universal One-Step RT-qPCR Kit (NEB #E3005E) in a QuantStudio 6 thermocycler (Applied  
434 Biosystems) or in a StepOne Plus thermocycler (Applied Biosystems). The primers used are described in **Table**  
435 **S4**. Cycling conditions were the following: 10 min at 55°C, 1 min at 95°C and 40 cycles of 95°C for 10s and 60°C

436 for 1 min. Results are expressed as genome copies/mL as the standard curve was performed by diluting a  
437 commercially available synthetic RNA with a known concentration (EURM-019, JRC). For SARS-CoV and  
438 MERS-CoV, qRT-PCR were performed using FAM-labelled probes (Eurogentec) and the Superscript III  
439 Platinum One-Step qRT-PCR System (Thermo Fisher Scientific, #11732020). The cycling conditions were the  
440 following: 20 min at 55°C, 3 min at 95°C and 50 cycles of 95°C for 15 s and 58°C for 30 s. The primers used are  
441 described in **Table S4**. Standard curves were performed using serial dilutions of RNA extracted from and SARS-  
442 CoV and MERS-CoV viral culture supernatants of known infectious titer. For plaque assay titration, VeroE6 cells  
443 were seeded in 24-well plates ( $10^5$  cells per well) and infected with serial dilutions of infectious supernatant  
444 diluted in DMEM during 1h at 37°C. After infection, 0.1% agarose semi-solid overlays were added. At 72h post-  
445 infection, cells were fixed with Formalin 4% (Sigma #HT501128-4L) and plaques were visualized using crystal  
446 violet coloration. Time-course experiments were performed the same way except that supernatants and cellular  
447 monolayers were harvested at 0h, 2h, 4h, 6h, 8h, 10h and 24h post-infection.

448  
449 **Overexpression assay.**  $2 \times 10^5$  293T-ACE2 cells were seeded in a 24-well plate 18h before experiment. Cells  
450 were transfected with 500 ng of plasmids expressing HA-DAXX WT, HA-DAXX 15KR and HA-DAXX $\Delta$ SIM  
451 plasmids, using Fugene 6 (Promega # E2691), following the manufacturer's instructions. HA-NBR1 was used as  
452 negative control. After 24h cells were infected at the indicated MOI in DMEM 2% FBS. When indicated, cells  
453 were treated with 10 mM of remdesivir (MedChemExpress #HY-104077) at the time of infection. For flow  
454 cytometry analysis, cells were fixed with 4% formaldehyde and permeabilized in a PBS 1% BSA 0.025% saponin  
455 solution for 30 min prior to staining with corresponding antibodies for 1h at 4°C diluted in the permeabilization  
456 solution. Samples were acquired on a BD LSR Fortessa and analyzed using FlowJo. Total RNA was extracted  
457 using a RNeasy Mini kit and submitted to DNase treatment (Qiagen). RNA concentration and purity were  
458 evaluated by spectrophotometry (NanoDrop 2000c, ThermoFisher). In addition, 500 ng of RNA were reverse  
459 transcribed with both oligo dT and random primers, using a PrimeScript RT Reagent Kit (Takara Bio) in a 10 mL  
460 reaction. Real-time PCR reactions were performed in duplicate using Takyon ROX SYBR MasterMix blue dTTP  
461 (Eurogentec) on an Applied Biosystems QuantStudio 5 (ThermoFisher). Transcripts were quantified using the  
462 following program: 3 min at 95°C followed by 35 cycles of 15s at 95°C, 20s at 60°C, and 20s at 72°C. Values for  
463 each transcript were normalized to expression levels of RPL13A. The primers used are indicated in **Table S4**.

464  
465 **Microscopy Immunolabeling and Imaging.** 293T-ACE2 cells were cultured and infected with SARS-CoV-2 as  
466 described above. When indicated, cells were treated with 50  $\mu$ M of GRL0617 (MedChemExpress #HY-117043)  
467 at the time of infection. Cultures were rinsed with PBS and fixed with 4% paraformaldehyde (electronic  
468 microscopy grade; Alfa Aesar) in PBS for 10 min at room temperature, treated with 50 mM NH<sub>4</sub>Cl for 10 min,  
469 permeabilized with 0.5% Triton X-100 for 15 min, and blocked with 0.3% BSA for 10 min. Cells were incubated  
470 with primary and secondary antibodies for 1h and 30 min, respectively, in a moist chamber. Nuclei were labeled  
471 with Hoechst dye (Molecular Probes). Images were acquired using a LSM700 (Zeiss) confocal microscope  
472 equipped with a 63X objective or by Airyscan LSM800 (Zeiss). Image analysis and quantification was performed  
473 using ImageJ.

474  
475 **Western blot.** 293T-ACE2 cells were transfected with the indicated plasmids or treated with the indicated  
476 concentrations of GRL0617; with 10  $\mu$ M of Masitinib (MedChemExpress #HY-10209); or with 10 $\mu$ M of MG132  
477 (SIGMA #M7449), an inhibitor of the proteasome and infected with SARS-CoV-2. Cell lysates were prepared  
478 using RIPA lysis and extraction buffer (ThermoFisher #89901). Protein concentration was determined using  
479 Bradford quantification. Proteins were denatured using 4X Bolt LDS Sample Buffer (Invitrogen) and 10X Bolt  
480 Sample Reducing Agent (Invitrogen). 40  $\mu$ g of proteins were denatured and loaded on 12% ProSieve gel and  
481 then subjected to electrophoresis. Gels were then transferred (1h, 90V) to Western blotting membranes,  
482 nitrocellulose (GE Healthcare #GE10600002) using Mini Trans-Blot Electrophoretic Transfer Cell (Biorad  
483 #1703930EDU). Membranes were blocked with 5% BSA in PBS (blocking buffer) and incubated with primary  
484 antibodies diluted in blocking buffer. Membranes were washed and incubated with secondary antibodies diluted  
485 in blocking buffer. Chemiluminescent acquisitions were performed on a Chemidoc<sup>TM</sup> MP Imager and analysed  
486 using Image Lab<sup>TM</sup> desktop software (Bio-Rad Laboratories).

487  
488 **Flow cytometry.** For flow cytometry analysis, all cells were fixed with 4% formaldehyde. For intracellular  
489 staining, cells were permeabilized in a PBS/1% BSA/0.025% saponin solution for 30 min prior to staining with  
490 corresponding primary antibodies for 1h at 4°C and then secondary antibodies for 45min at 4°C, diluted in the  
491 permeabilization solution. Acquisition was done with Fortessa Cytometer and analyses with FlowJo software  
492 (Treestar Inc., Oregon, USA).

493

494 **Single-cell RNAseq analysis.** Single cell RNAseq analysis were performed in the BioTuring Browser Software  
495 (v2.8.42) developed by BioTuring, using a dataset made available by Liao *et al.* (43) (ID: GSE145926). All  
496 processing steps were done by BioTuring Browser (71). Cells with less than 200 genes and mitochondrial genes  
497 higher than 10% were excluded from the analysis.

498  
499 **Statistical analysis.** GraphPad Prism was used for statistical analyses. Linear models were computed using  
500 Rstudio.



501

**Figures.**

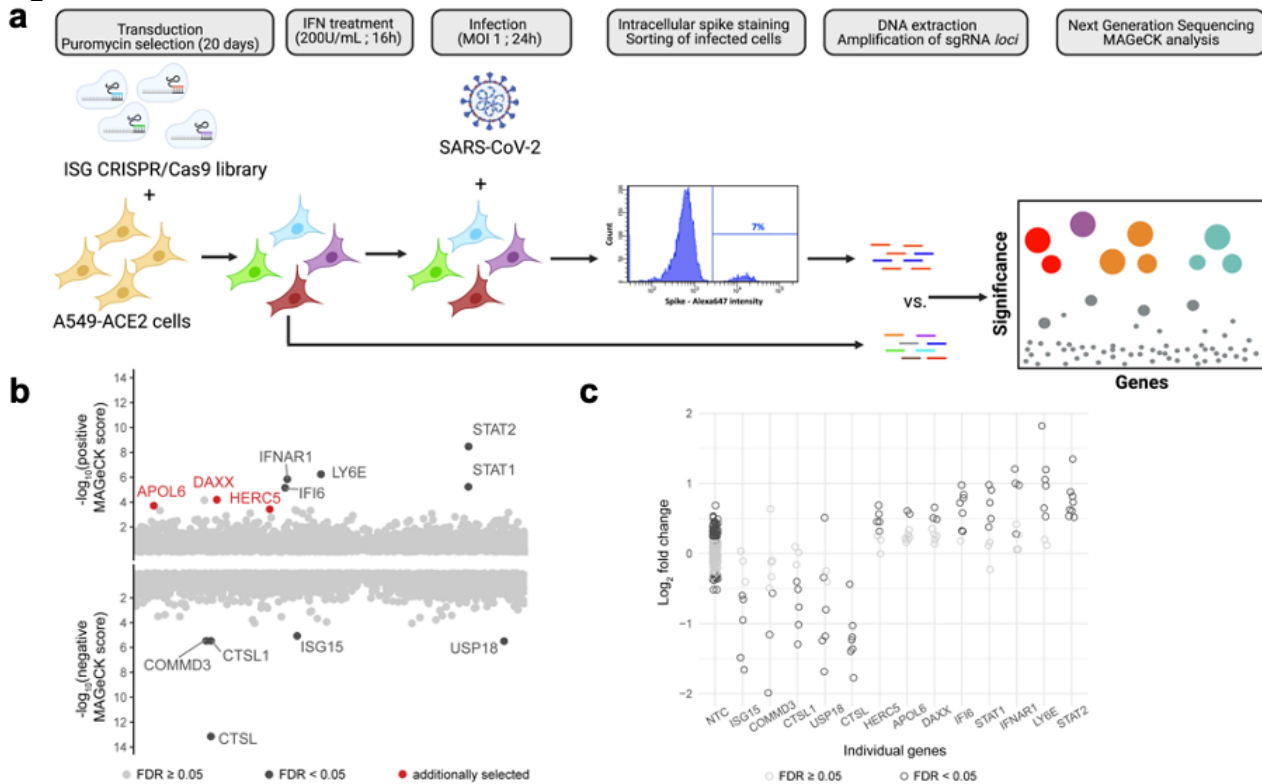

502

503

504

505

506

507

508

509

510

511

512

513

514

515

516

517

518

519

520

521

**Figure 1: ISG-focused CRISPR/Cas9 screening approach to identify restriction factors for SARS-CoV-2. a: CRISPR/Cas9 screen outline.** A549-ACE2 cells were transduced with lentivectors encoding the ISG CRISPR/Cas9 library and selected by puromycin treatment for 20 days. Library cells were then pre-treated with 200 U/mL of IFN $\alpha$  for 16 hours, and infection with SARS-CoV-2 at MOI 1. At 24h p.i., infected cells were fixed with formalin treatment, permeabilized by saponin treatment and stained with a monoclonal anti-spike antibody. After secondary staining, infected cells were sorted and harvested. Non-infected, non-IFN $\alpha$  treated cells were harvested as a control. DNA was extracted from both cellular fractions and sgRNA loci amplification was carried out by PCR. Following NGS, bioinformatic analysis using the MAGeCK package was conducted. **b: Screen results.** By taking into account the enrichment ratios of each of the 8 different sgRNAs for every gene, the MAGeCK analysis provides a positive score for KO enriched in infected cells (*i.e.* restriction factor, represented in the top fraction of the graph) and a negative score for KO depleted in infected cells (*i.e.* proviral factors, represented in the bottom portion of the graph). Gene with an FDR < 0.05 are represented in black. 3 genes with a FDR > 0.05, but with a p-value < 0.005 were additionally selected and are represented in red. **c: Individual sgRNA enrichment.** For the indicated genes, the enrichment ratio of the 8 sgRNAs present in the library was calculated as the MAGeCK normalized read counts in infected cells divided by those in the original pool of cells and is represented in log<sub>2</sub> fold change. As a control, the enrichment ratios of the 200 non-targeting control (NTCs) is also represented.

522

| Gene   | % of alleles edited |
|--------|---------------------|
| LY6E   | 96 ± 1.73           |
| DAXX   | 79,67 ± 2.52        |
| APOL6  | 99 ± 0              |
| HERC5  | 97 ± 0              |
| CTSL   | 91 ± 1              |
| IFI6   | 88,33 ± 0.58        |
| IFNAR1 | 76,67 ± 3.21        |

523

524

525

**Table 1: Gene editing efficiency.** The frequency of editing was determined using Sanger sequencing and ICE analysis. Values are represented as mean ± SD (n=3).

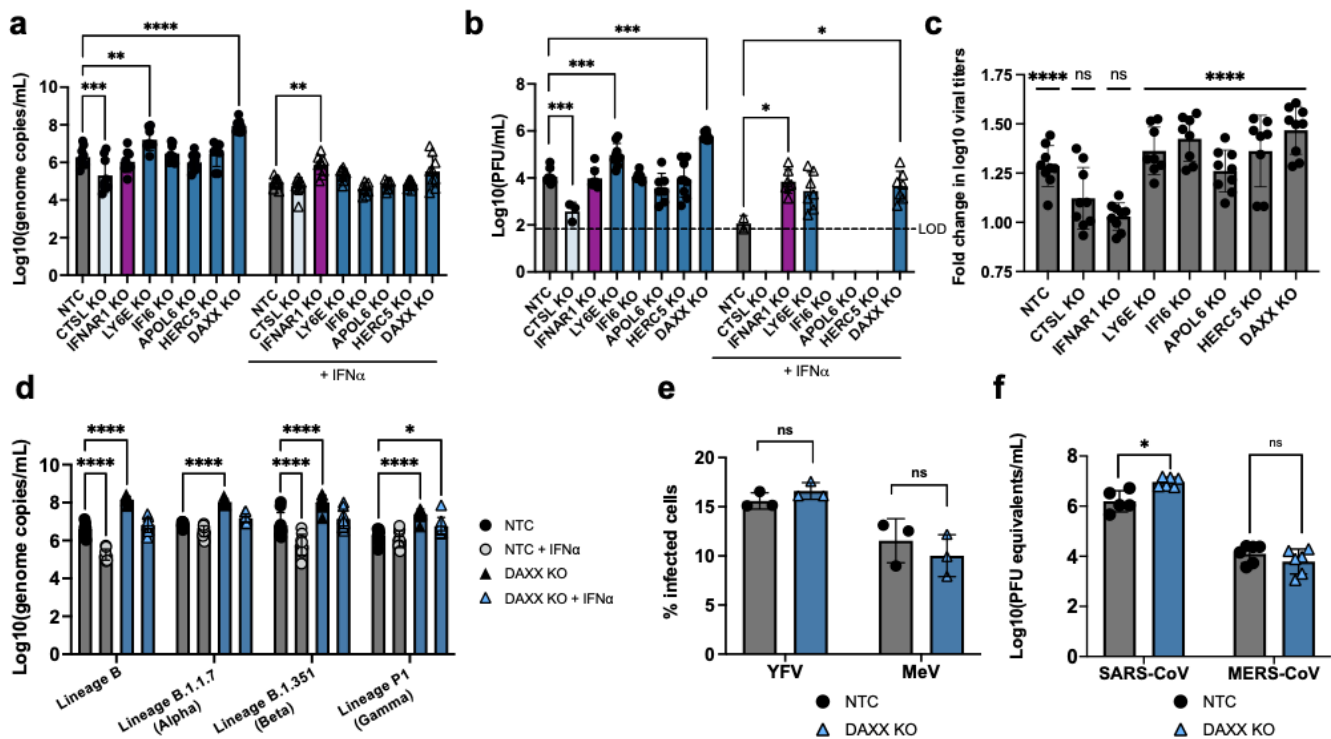

**Figure 2: DAXX is a restriction factor for SARS-CoV-2. a-c: Antiviral activity of ISGs against SARS-CoV-2.** A549-ACE2 knocked-out for the indicated genes were generated using a multi-guide approach, leading to pools of KO cells with a high frequency of indels. KO cells were pre-treated with 0 (circles) or 200 (triangles) U/mL of IFN $\alpha$  24h prior to triplicate infection with SARS-CoV-2 (MOI 0.1). Supernatants were harvested at 72h p.i. The mean of three independent experiments, with infections carried out in triplicate, is shown. **a**: For the titration of RNA levels, supernatants were heat inactivated prior to quantification by qRT-PCR. Genome copies/mL were calculated by performing serial dilutions of a synthetic RNA with a known concentration. Statistics: 2-way ANOVA using Dunnett's test, \* = p-value < 0.05, \*\* = p-value < 0.01, \*\*\* = p-value < 0.001, \*\*\*\* = p-value < 0.0001. **b**: For the titration of infectious virus levels by plaque assay, supernatants were serially diluted and used to infect VeroE6 cells. Plaques formed after 3 days of infection were quantified using crystal violet coloration. Statistics: Dunnett's test on a linear model, \* p-value < 0.05, \*\* p-value < 0.01, \*\*\* p-value < 0.001. **c**: For each of the indicated KO, the data shown in **a** is represented as fold change in log10 titers (*i.e.* the triplicate log10 titers of the non-treated condition divided by the mean of the triplicate log10 titers IFN $\alpha$ -treated condition, n=3). Statistics: 2-way ANOVA using Sidak's test, ns = p-value > 0.05, \*\*\*\* = p-value < 0.0001. **d-f: Antiviral activity of DAXX against SARS-CoV-2 variants and other viruses. d**: A549-ACE2 WT or DAXX KO cells were infected in triplicates at an MOI of 0.1 with the following SARS-CoV-2 strains: Lineage B (original strain); Lineage B.1.1.7. (Alpha variant); Lineage B.1.351 (Beta variant); Lineage P1 (Gamma variant). Supernatants were harvested at 72h p.i. Supernatants were heat inactivated prior to quantification by qRT-PCR. Genome copies/mL were calculated by performing serial dilutions of a synthetic RNA with a known concentration. The mean of three independent experiments, with infections carried out in triplicate, is shown. **e**: A549-ACE2 WT or DAXX KO cells were infected in triplicates with Yellow Fever Virus (YFV, Asibi strain, MOI of 0.3) or with Measles Virus (MeV, Schwarz strain expressing GFP, MOI of 0.2). At 24h p.i., the percentages of cells positive for viral protein E (YFV) or GFP (MeV) was assessed by flow cytometry. The mean of 3 independent experiments is represented. **f**: WT or DAXX KO cells were infected in triplicates at an MOI of 0.1 with SARS-CoV or MERS-CoV. Supernatants were harvested at 72h p.i. Supernatants were heat inactivated prior to quantification by qRT-PCR. Serial dilutions of a stock of known infectious titer was used as a standard. The mean of 2 independent experiments is represented. Statistics: 2-way ANOVA using Dunnett's test, \* = p-value < 0.05, \*\*\* = p-value < 0.001, \*\*\*\* = p-value < 0.0001

526  
527  
528  
529  
530  
531  
532  
533  
534  
535  
536  
537  
538  
539  
540  
541  
542  
543  
544  
545  
546  
547  
548  
549  
550  
551  
552  
553  
554  
555  
556  
557



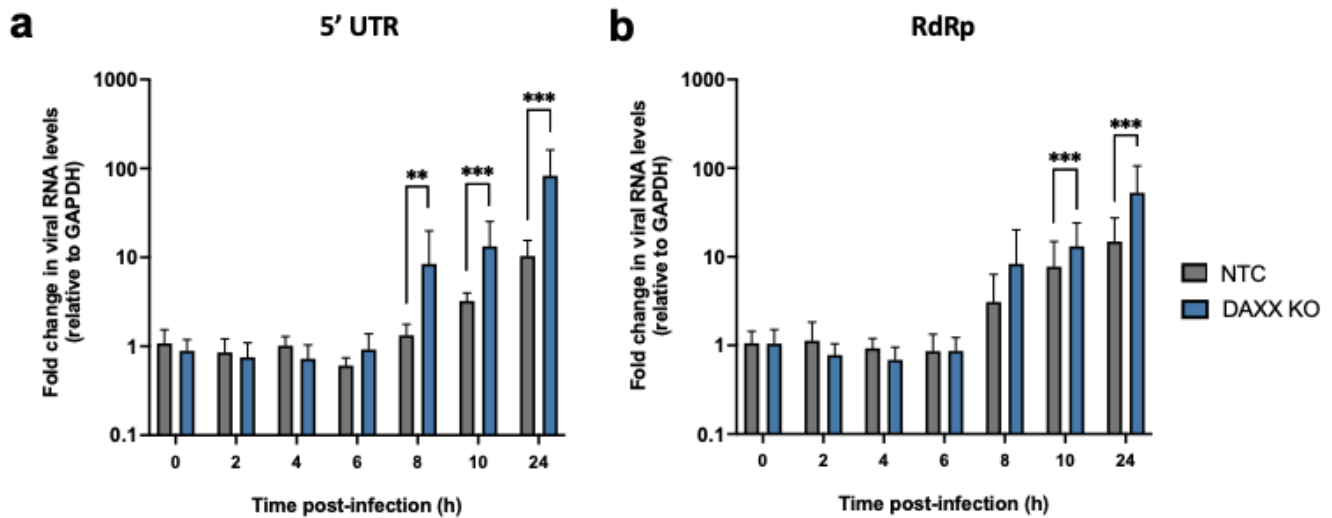

558  
559  
560  
561  
562  
563

**Figure 3: DAXX restricts SARS-CoV-2 transcription.** A549-ACE2 WT or DAXX KO were infected at MOI 1 in triplicates. Cell monolayers were harvested at the indicated time points, and total RNA was extracted. The levels of viral RNA (**a**: 5' UTR; **b**: RdRp) were determined by qRT-PCR and normalized against GAPDH levels. The mean of 3 independent experiments is represented. Statistics: Dunnett's test on a linear model, \* p-value < 0.05, \*\* p-value < 0.01, \*\*\* p-value < 0.001.

564

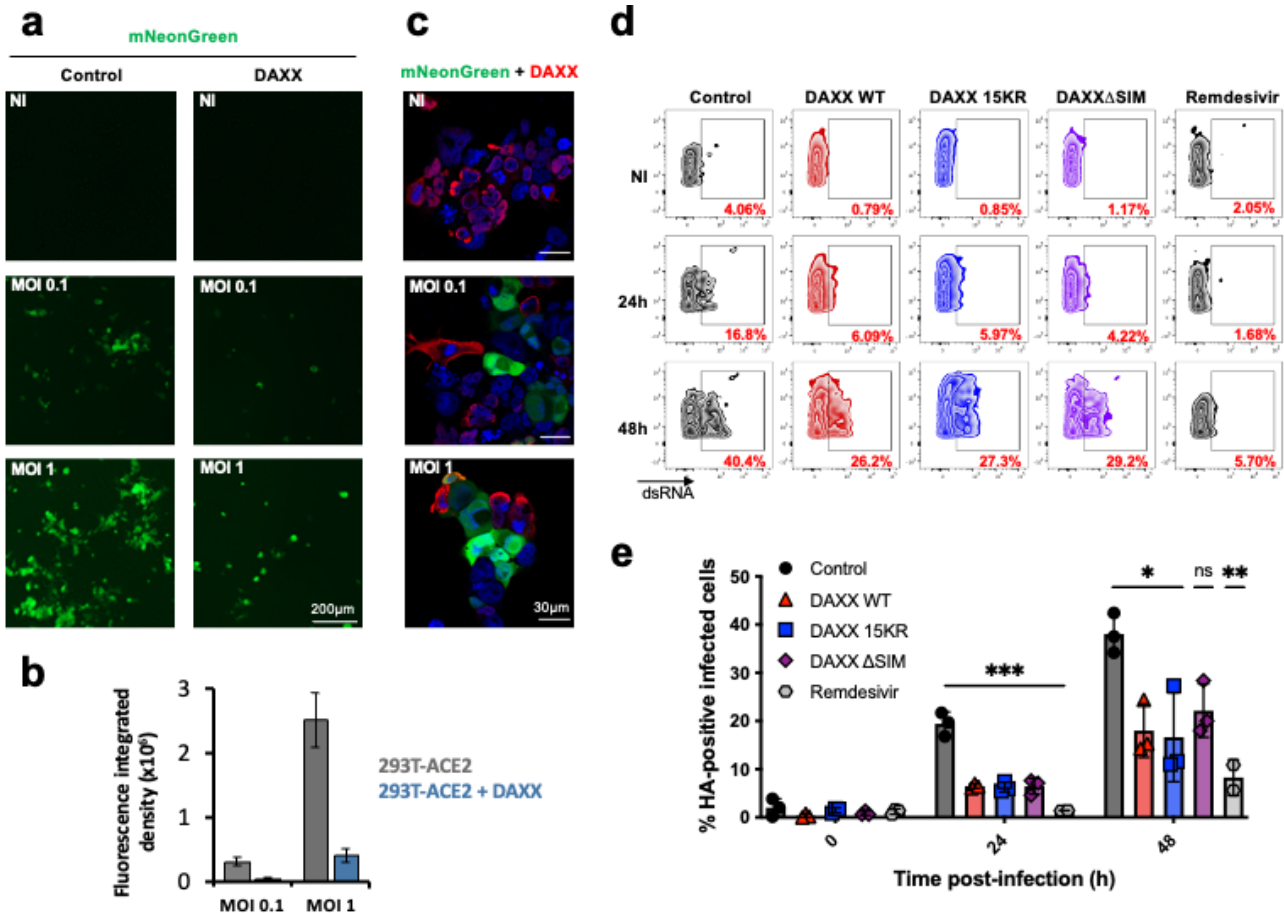

565

566

567

568

569

570

571

572

573

574

575

576

577

578

579

580

581

**Figure 4: DAXX restriction of SARS-CoV-2 is SUMOylation independent. a-c: DAXX overexpression restricts SARS-CoV-2.** 293T-ACE2 cells were transfected with DAXX WT. 24h after transfection, cells were infected with the mNeonGreen fluorescent reporter SARS-CoV-2 at the indicated MOI. Cells were either visualized with an EVOS fluorescence microscope (a-b) or stained with an HA-antibody detecting DAXX and imaged by confocal microscopy (c). Scale bars correspond to 200  $\mu$ m (a) and 30  $\mu$ m (c). Images shown in (a) were quantified using ImageJ software (b). Data show the mean  $\pm$  SD of Fluorescence integrated densities. The analysis was performed on around 200 cells from 3 different fields. **d-e: DAXX mutants are still able to restrict SARS-CoV-2.** 293T-ACE2 cells were transfected with HA-DAXX WT; HA-DAXX 15KR; HA-DAXX  $\Delta$ SIM; or with HA-NBR1 as negative control plasmid. 24h after transfection, cells were infected with SARS-CoV-2 at an MOI of 0.1. When indicated, cells were treated with remdesivir at the time of infection. After 24h or 48h, infected cells were double-stained recognizing dsRNAs (to read out infection) and HA (to read out transfection efficiency) and acquired by flow cytometry. The percentage of infected cells among HA-positive (transfected) cells for one representative experiment is shown in d, for the mean of 3 independent experiments in e. Statistics: one-way ANOVA using Dunnett's test, Holm corrected, ns = p-value > 0.05, \* = p-value < 0.05, \*\* = p-value < 0.01, \*\*\* = p-value < 0.001.

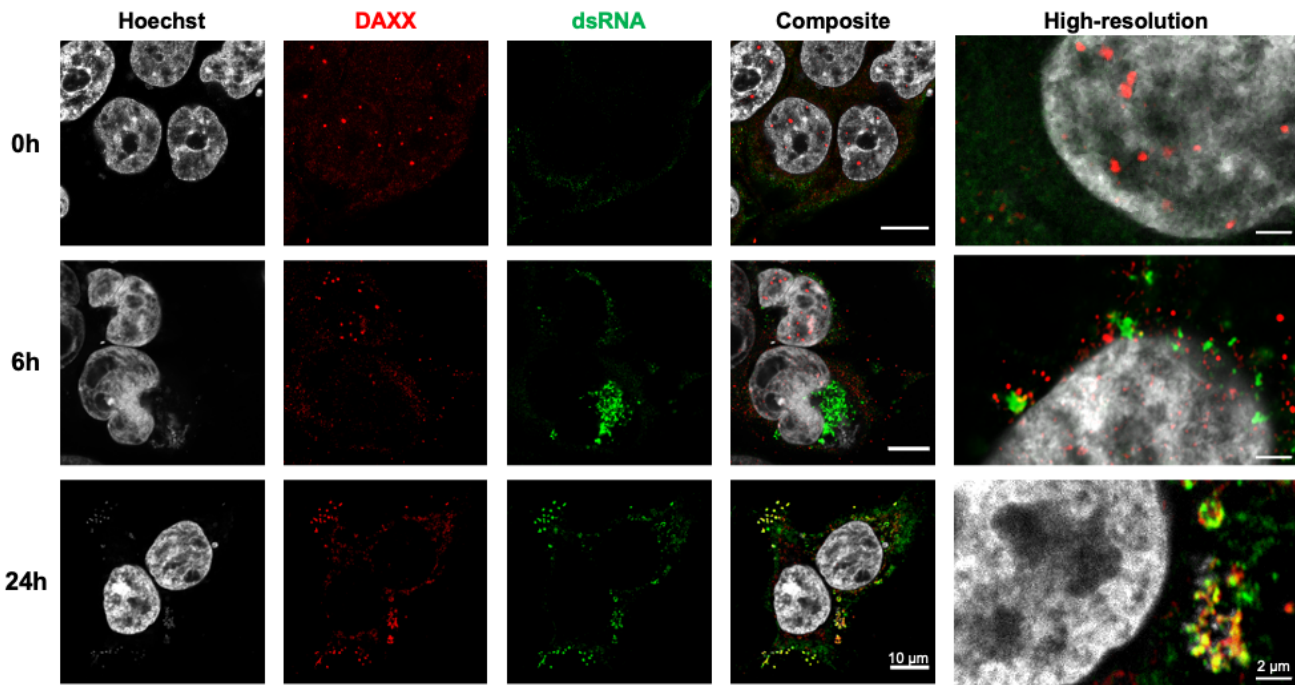

**Figure 5: SARS-CoV-2 infection induces DAXX cytoplasmic re-localization to sites of viral replication.** 293T-ACE2 cells were infected with SARS-CoV-2 at the indicated MOI 1. 24h post-infection, cells were labelled with Hoescht and with antibodies against dsRNA (detecting viral RNA, in green) and HA (detecting DAXX, in red). When indicated, the high-resolution Airyscan mode was used. Scale bars correspond to 10  $\mu\text{m}$  for confocal images, and 2  $\mu\text{m}$  for the high-resolution images.



589

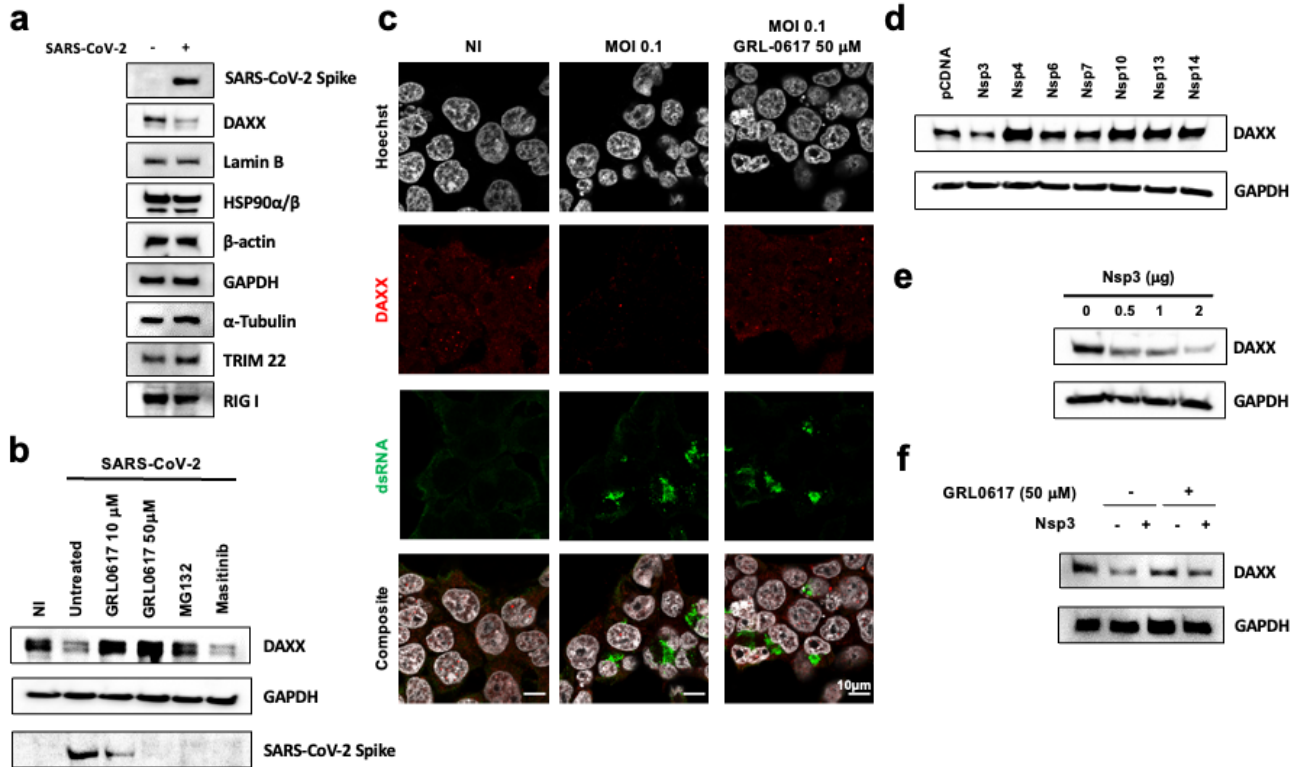

590

591

592

593

594

595

596

597

598

599

600

601

602

603

604

605

606

607

608

**Figure 6: SARS-CoV-2 PLpro induces the proteasomal degradation of DAXX.** **a: DAXX degradation after infection.** 293T-ACE2 cells were infected with SARS-CoV-2 at MOI 0.1. After 24h, cells were harvested and levels of DAXX, Lamin B, HSP90, Actin, GAPDH, Tubulin, TRIM22, RIG-I and of the viral protein spike were analyzed by Western Blot. **b: GRL0617 and MG132 treatment restores DAXX expression.** 293T-ACE2 cells were infected with SARS-CoV-2 at MOI 0.1. When indicated, cells were pretreated 2h before infection with GRL0617 (at the indicated concentrations), or with MG132 (10  $\mu$ M), a proteasome inhibitor, or Masitinib (10  $\mu$ M) a 3CL inhibitor. After 24h, cells were harvested and levels of DAXX, GAPDH and of the viral protein spike were analyzed by Western Blot. **c: GRL0617 treatment restores DAXX localization.** 293T-ACE2 cells were infected with SARS-CoV-2 at MOI 0.1. 24h post-infection, cells were labelled with Hoescht and with antibodies against dsRNA (detecting viral RNA, in green) and HA (detecting DAXX, in red). When indicated, cells were treated with 50  $\mu$ M of GRL0617 at the time of infection. Scale bars correspond to 10  $\mu$ m. **d-f: Nsp3 induces DAXX degradation.** **D:** 293T-ACE2 cells were transfected with 1  $\mu$ g of the indicated viral proteins. After 24h, the levels of DAXX and GAPDH were analyzed by Western Blot. **E:** 293T-ACE2 cells were transfected with the indicated amounts of Nsp3. After 24h, the levels of DAXX and GAPDH were analyzed by Western Blot. **f:** 293T-ACE2 cells were transfected with 1  $\mu$ g of Nsp3. 6 hours post transfection, cells were also, when indicated, treated with 50  $\mu$ M of GRL0617. 24h after transfection, the levels of DAXX and GAPDH were analyzed by Western Blot.

609 **Acknowledgements.** We thank the Cytometry Platform, Center for Technological Resources and  
610 Research, Institut Pasteur, for cell sorting experiments. This work was funded by the Institut Pasteur  
611 Coronavirus Task Force, CNRS (UMR 3569), the Labex IBEID (ANR-10-LABX-62-IBEID) and by the  
612 ANR (ANR-20-COVI-000, projects IDISCOVER to M.V. and Alpha-COV to S.N.). A.M.K. is supported by  
613 a grant of the French Ministry of Higher Education, Research and Innovation. G.M. is supported by a  
614 grant from the Agence nationale de recherches sur le sida et les hépatites virales (ANRS). We thank  
615 Michael Emerman, Daniel Marc and Ignacio Caballero-Posadas for helpful comments on the  
616 manuscript. Illustrative figures in this manuscript were created with BioRender.com.

617  
618 **Contributions.** F.R. designed the research project. F.R. and M.V. secured the funding for the study.  
619 A.M.K., S.M.A., A.H., N.A., S.N., G.M., D.Q.T., M.C., T.V. and F.R. performed and analyzed the *in*  
620 *vitro* experiments. F.P. produced the stocks of lentiviruses. J.C.S., J.O. and K.H. generated and  
621 validated KO cell lines. T.B. performed the single-cell RNAseq data analysis. S.M. and F.D. performed  
622 the SARS-CoV and MERS-CoV experiments. A.B. and E.S.L. performed the bio-informatic analyses of  
623 the CRISPR/Cas9 screen. M.O., T.B., O.S., N.J., S.N., S.V.D.W. and M.V. analyzed the data and  
624 supervised the project. A.M.K., N.J. and F.R. wrote the manuscript. All authors edited the manuscript.

625  
626 **Competing Interests:** J.C.S., J.O. and K.H. are employees and shareholders from Synthego  
627 Corporation.

628  
629 **Correspondence and requests for materials** should be addressed to either M.V., N.J., S.N. or F.R.

630  
631 **Data availability:** Raw NGS data was deposited to the NCBI GEO portal and is accessible with the  
632 number GSE173418.

## References.

- 633 1. Ruetsch C, Brglez V, Crémoni M, Zorzi K, Fernandez C, Boyer-Suavet S, et al. Functional  
634 Exhaustion of Type I and II Interferons Production in Severe COVID-19 Patients. *Front Med.* 2021 Jan  
635 27;7:603961.
- 636 2. Hadjadj J, Yatim N, Barnabei L, Corneau A, Boussier J, Smith N, et al. Impaired type I  
637 interferon activity and inflammatory responses in severe COVID-19 patients. *Science.* 2020 Aug  
638 7;369(6504):718–24.
- 639 3. Combes AJ, Courau T, Kuhn NF, Hu KH, Ray A, Chen WS, et al. Global absence and targeting  
640 of protective immune states in severe COVID-19. *Nature.* 2021 Mar 1;591(7848):124–30.
- 641 4. Blanco-Melo D, Nilsson-Payant BE, Liu W-C, Uhl S, Hoagland D, Møller R, et al. Imbalanced  
642 Host Response to SARS-CoV-2 Drives Development of COVID-19. *Cell.* 2020 May;181(5):1036-  
643 1045.e9.
- 644 5. Galani I-E, Rovina N, Lampropoulou V, Triantafyllia V, Manioudaki M, Pavlos E, et al.  
645 Untuned antiviral immunity in COVID-19 revealed by temporal type I/III interferon patterns and flu  
646 comparison. *Nat Immunol.* 2021 Jan;22(1):32–40.
- 647 6. Bastard P, Rosen LB, Zhang Q, Michailidis E, Hoffmann H-H, Zhang Y, et al. Autoantibodies  
648 against type I IFNs in patients with life-threatening COVID-19. *Science.* 2020 Oct  
649 23;370(6515):eabd4585.
- 650 7. Zhang Q, Bastard P, Liu Z, Le Pen J, Moncada-Velez M, Chen J, et al. Inborn errors of type I  
651 IFN immunity in patients with life-threatening COVID-19. *Science.* 2020 Oct 23;370(6515):eabd4570.
- 652 8. Sa Ribero M, Jouvenet N, Dreux M, Nisole S. Interplay between SARS-CoV-2 and the type I  
653 interferon response. *PLOS Pathog.* 2020 Jul 29;16(7):e1008737.
- 654 9. Rebendenne A, Chaves Valadão AL, Tauziet M, Maarifi G, Bonaventure B, McKellar J, et al.  
655 SARS-CoV-2 Triggers an MDA-5-Dependent Interferon Response Which Is Unable To Control  
656 Replication in Lung Epithelial Cells. *J Virol.* 2021 Mar 25;95(8):e02415-20.

- 657 10. Yin X, Riva L, Pu Y, Martin-Sancho L, Kanamune J, Yamamoto Y, et al. MDA5 Governs the  
658 Innate Immune Response to SARS-CoV-2 in Lung Epithelial Cells. *Cell Rep.* 2021 Jan;34(2):108628.
- 659 11. Felgenhauer U, Schoen A, Gad HH, Hartmann R, Schaubmar AR, Failing K, et al. Inhibition of  
660 SARS-CoV-2 by type I and type III interferons. *J Biol Chem.* 2020 Oct 9;295(41):13958–64.
- 661 12. Lokugamage KG, Hage A, de Vries M, Valero-Jimenez AM, Schindewolf C, Dittmann M, et al.  
662 Type I Interferon Susceptibility Distinguishes SARS-CoV-2 from SARS-CoV. *J Virol.* 2020 Nov  
663 9;94(23):e01410-20.
- 664 13. Hoagland DA, Møller R, Uhl SA, Oishi K, Frere J, Golyner I, et al. Leveraging the antiviral  
665 type I interferon system as a first line of defense against SARS-CoV-2 pathogenicity. *Immunity.* 2021  
666 Jan;S1074761321000406.
- 667 14. Busnadiego I, Fernbach S, Pohl MO, Karakus U, Huber M, Trkola A, et al. Antiviral Activity of  
668 Type I, II, and III Interferons Counterbalances ACE2 Inducibility and Restricts SARS-CoV-2. *mBio.*  
669 2020 Oct 27;11(5):e01928-20.
- 670 15. Zhao X, Zheng S, Chen D, Zheng M, Li X, Li G, et al. LY6E Restricts Entry of Human  
671 Coronaviruses, Including Currently Pandemic SARS-CoV-2. *J Virol.* 2020 Aug 31;94(18):e00562-20.
- 672 16. Pfaender S, Mar KB, Michailidis E, Kratzel A, Boys IN, V'kovski P, et al. LY6E impairs  
673 coronavirus fusion and confers immune control of viral disease. *Nat Microbiol.* 2020 Nov;5(11):1330–  
674 9.
- 675 17. Shi G, Kenney AD, Kudryashova E, Zani A, Zhang L, Lai KK, et al. Opposing activities of  
676 IFITM proteins in SARS-CoV-2 infection. *EMBO J.* 2021 Feb 1;40(3):e106501.
- 677 18. Buchrieser J, Dufloo J, Hubert M, Monel B, Planas D, Rajah MM, et al. Syncytia formation by  
678 SARS-CoV-2-infected cells. *EMBO J.* 2020 Dec;39(23).
- 679 19. Biering SB, Sarnik SA, Wang E, Zengel JR, Sathyan V, Nguyenla X, et al. Genome-wide,  
680 bidirectional CRISPR screens identify mucins as critical host factors modulating SARS-CoV-2  
681 infection. *bioRxiv.* 2021 Jan 1;2021.04.22.440848.
- 682 20. Nchioua R, Kmiec D, Müller JA, Conzelmann C, Groß R, Swanson CM, et al. SARS-CoV-2 Is  
683 Restricted by Zinc Finger Antiviral Protein despite Preadaptation to the Low-CpG Environment in  
684 Humans. *mBio.* 2020 Oct 27;11(5):e01930-20.
- 685 21. Wickenhagen A, Sugrue E, Lytras S, Kuchi S, Noerenberg M, Turnbull ML, et al. A prenylated  
686 dsRNA sensor protects against severe COVID-19. *Science.* 2021 Sep 28;eabj3624.
- 687 22. Martin-Sancho L, Lewinski MK, Pache L, Stoneham CA, Yin X, Becker ME, et al. Functional  
688 Landscape of SARS-CoV-2 Cellular Restriction. *Mol Cell.* 2021 Apr 13;
- 689 23. Bonaventure B, Rebendenne A, Garcia de GF, McKellar J, Tauziet M, Chaves Valadão AL, et  
690 al. A genome-wide CRISPR/Cas9 knock-out screen identifies the DEAD box RNA helicase DDX42 as  
691 a broad antiviral inhibitor. *bioRxiv.* 2020 Jan 1;2020.10.28.359356.
- 692 24. Hoffmann H-H, Sánchez-Rivera FJ, Schneider WM, Luna JM, Soto-Feliciano YM, Ashbrook  
693 AW, et al. Functional interrogation of a SARS-CoV-2 host protein interactome identifies unique and  
694 shared coronavirus host factors. *Cell Host Microbe.* 2021 Feb;29(2):267-280.e5.
- 695 25. Daniloski Z, Jordan TX, Wessels H-H, Hoagland DA, Kasela S, Legut M, et al. Identification of  
696 Required Host Factors for SARS-CoV-2 Infection in Human Cells. *Cell.* 2021 Jan;184(1):92-105.e16.
- 697 26. Wei J, Alfajaro MM, DeWeirdt PC, Hanna RE, Lu-Culligan WJ, Cai WL, et al. Genome-wide  
698 CRISPR Screens Reveal Host Factors Critical for SARS-CoV-2 Infection. *Cell.* 2021 Jan;184(1):76-  
699 91.e13.
- 700 27. Schneider WM, Luna JM, Hoffmann H-H, Sánchez-Rivera FJ, Leal AA, Ashbrook AW, et al.  
701 Genome-Scale Identification of SARS-CoV-2 and Pan-coronavirus Host Factor Networks. *Cell.* 2021  
702 Jan;184(1):120-132.e14.
- 703 28. Wang R, Simoneau CR, Kulsuptrakul J, Bouhaddou M, Trivisano KA, Hayashi JM, et al.  
704 Genetic Screens Identify Host Factors for SARS-CoV-2 and Common Cold Coronaviruses. *Cell.* 2021  
705 Jan;184(1):106-119.e14.

- 706 29. Baggen J, Persoons L, Vanstreels E, Jansen S, Van Looveren D, Boeckx B, et al. Genome-wide  
707 CRISPR screening identifies TMEM106B as a proviral host factor for SARS-CoV-2. *Nat Genet.* 2021  
708 Apr;53(4):435–44.
- 709 30. Tang J, Wu S, Liu H, Stratt R, Barak OG, Shiekhattar R, et al. A novel transcription regulatory  
710 complex containing death domain-associated protein and the ATR-X syndrome protein. *J Biol Chem.*  
711 2004 May 7;279(19):20369–77.
- 712 31. Porter SS, Stepp WH, Stamos JD, McBride AA. Host cell restriction factors that limit  
713 transcription and replication of human papillomavirus. *Virus Res.* 2017 Mar 2;231:10–20.
- 714 32. Maillet S, Fernandez J, Decourcelle M, El Koulali K, Blanchet FP, Arhel NJ, et al. Daxx  
715 Inhibits HIV-1 Reverse Transcription and Uncoating in a SUMO-Dependent Manner. *Viruses.* 2020  
716 Jun 11;12(6).
- 717 33. Dutrieux J, Maarifi G, Portilho DM, Arhel NJ, Chelbi-Alix MK, Nisole S. PML/TRIM19-  
718 Dependent Inhibition of Retroviral Reverse-Transcription by Daxx. *PLoS Pathog.* 2015  
719 Nov;11(11):e1005280.
- 720 34. OhAinle M, Helms L, Vermeire J, Roesch F, Humes D, Basom R, et al. A virus-packageable  
721 CRISPR screen identifies host factors mediating interferon inhibition of HIV. *eLife.* 2018 Dec  
722 6;7:e39823.
- 723 35. Li W, Xu H, Xiao T, Cong L, Love MI, Zhang F, et al. MAGeCK enables robust identification  
724 of essential genes from genome-scale CRISPR/Cas9 knockout screens. *Genome Biol.* 2014 Dec  
725 5;15(12):554.
- 726 36. Katopodis P, Anikin V, Randeva HS, Spandidos DA, Chatha K, Kyrou I, et al. Pan-cancer  
727 analysis of transmembrane protease serine 2 and cathepsin L that mediate cellular SARS-CoV-2  
728 infection leading to COVID-19. *Int J Oncol.* 2020 Aug;57(2):533–9.
- 729 37. Malakhova OA, Yan M, Malakhov MP, Yuan Y, Ritchie KJ, Kim KI, et al. Protein ISGylation  
730 modulates the JAK-STAT signaling pathway. *Genes Dev.* 2003 Feb 15;17(4):455–60.
- 731 38. Broering R, Zhang X, Kottlilil S, Trippler M, Jiang M, Lu M, et al. The interferon stimulated  
732 gene 15 functions as a proviral factor for the hepatitis C virus and as a regulator of the IFN response.  
733 *Gut.* 2010 Aug;59(8):1111–9.
- 734 39. McLaren PJ, Gawanbacht A, Pyndiah N, Krapp C, Hotter D, Kluge SF, et al. Identification of  
735 potential HIV restriction factors by combining evolutionary genomic signatures with functional  
736 analyses. *Retrovirology.* 2015 May 16;12:41.
- 737 40. Richardson RB, Ohlson MB, Eitson JL, Kumar A, McDougal MB, Boys IN, et al. A CRISPR  
738 screen identifies IFI6 as an ER-resident interferon effector that blocks flavivirus replication. *Nat*  
739 *Microbiol.* 2018 Nov;3(11):1214–23.
- 740 41. Merkl PE, Orzalli MH, Knipe DM. Mechanisms of Host IFI16, PML, and Daxx Protein  
741 Restriction of Herpes Simplex Virus 1 Replication. *J Virol.* 2018 May 15;92(10).
- 742 42. Jacquet S, Pontier D, Etienne L. Rapid Evolution of HERC6 and Duplication of a Chimeric  
743 HERC5/6 Gene in Rodents and Bats Suggest an Overlooked Role of HERCs in Mammalian Immunity.  
744 *Front Immunol.* 2020;11:605270.
- 745 43. Liao M, Liu Y, Yuan J, Wen Y, Xu G, Zhao J, et al. Single-cell landscape of bronchoalveolar  
746 immune cells in patients with COVID-19. *Nat Med.* 2020 Jun 1;26(6):842–4.
- 747 44. Haugh KA, Shalginiskikh N, Nogusa S, Skalka AM, Katz RA, Balachandran S. The interferon-  
748 inducible antiviral protein Daxx is not essential for interferon-mediated protection against avian  
749 sarcoma virus. *Virol J.* 2014 May 28;11:100.
- 750 45. Guo K, Barrett BS, Mickens KL, Hasenkrug KJ, Santiago ML. Interferon Resistance of  
751 Emerging SARS-CoV-2 Variants. *BioRxiv Prepr Serv Biol.* 2021 Mar 21;
- 752 46. Maillet S, Nisole S. Daxx, a broad-spectrum viral restriction factor. *Virol Montrouge Fr.* 2016  
753 Oct 1;20(5):261–72.
- 754 47. Kuo H-Y, Chang C-C, Jeng J-C, Hu H-M, Lin D-Y, Maul GG, et al. SUMO modification



- 755 negatively modulates the transcriptional activity of CREB-binding protein via the recruitment of Daxx.  
756 Proc Natl Acad Sci U S A. 2005 Nov 22;102(47):16973–8.
- 757 48. Shih H-M, Chang C-C, Kuo H-Y, Lin D-Y. Daxx mediates SUMO-dependent transcriptional  
758 control and subnuclear compartmentalization. Biochem Soc Trans. 2007 Dec;35(Pt 6):1397–400.
- 759 49. Sudharsan R, Azuma Y. The SUMO ligase PIAS1 regulates UV-induced apoptosis by  
760 recruiting Daxx to SUMOylated foci. J Cell Sci. 2012 Dec 1;125(Pt 23):5819–29.
- 761 50. Jang M-S, Ryu S-W, Kim E. Modification of Daxx by small ubiquitin-related modifier-1.  
762 Biochem Biophys Res Commun. 2002 Jul 12;295(2):495–500.
- 763 51. Lin D-Y, Huang Y-S, Jeng J-C, Kuo H-Y, Chang C-C, Chao T-T, et al. Role of SUMO-  
764 interacting motif in Daxx SUMO modification, subnuclear localization, and repression of sumoylated  
765 transcription factors. Mol Cell. 2006 Nov 3;24(3):341–54.
- 766 52. Xie X, Muruato A, Lokugamage KG, Narayanan K, Zhang X, Zou J, et al. An Infectious cDNA  
767 Clone of SARS-CoV-2. Cell Host Microbe. 2020 May 13;27(5):841-848.e3.
- 768 53. Liu G, Lee J-H, Parker ZM, Acharya D, Chiang JJ, van Gent M, et al. ISG15-dependent  
769 activation of the sensor MDA5 is antagonized by the SARS-CoV-2 papain-like protease to evade host  
770 innate immunity. Nat Microbiol. 2021 Apr;6(4):467–78.
- 771 54. Shin D, Mukherjee R, Grewe D, Bojkova D, Baek K, Bhattacharya A, et al. Papain-like  
772 protease regulates SARS-CoV-2 viral spread and innate immunity. Nature. 2020 Nov;587(7835):657–  
773 62.
- 774 55. Mohamud Y, Xue YC, Liu H, Ng CS, Bahreyni A, Jan E, et al. The papain-like protease of  
775 coronaviruses cleaves ULK1 to disrupt host autophagy. Biochem Biophys Res Commun. 2021  
776 Feb;540:75–82.
- 777 56. Saiz M, Martinez-Salas E. Uncovering targets of the Leader protease: Linking RNA-mediated  
778 pathways and antiviral defense. Wiley Interdiscip Rev RNA. 2021 Feb 18;e1645.
- 779 57. Drayman N, DeMarco JK, Jones KA, Azizi S-A, Froggatt HM, Tan K, et al. Masitinib is a  
780 broad coronavirus 3CL inhibitor that blocks replication of SARS-CoV-2. Science. 2021 Aug  
781 20;373(6557):931–6.
- 782 58. Miserey-Lenkei S, Trajkovic K, D'Ambrosio JM, Patel AJ, Čopić A, Mathur P, et al. A  
783 comprehensive library of fluorescent constructs of SARS-CoV-2 proteins and their initial  
784 characterisation in different cell types. Biol Cell. 2021 Jul;113(7):311–28.
- 785 59. Shaw AE, Hughes J, Gu Q, Behdenna A, Singer JB, Dennis T, et al. Fundamental properties of  
786 the mammalian innate immune system revealed by multispecies comparison of type I interferon  
787 responses. PLoS Biol. 2017 Dec 18;15(12):e2004086–e2004086.
- 788 60. Schreiner S, Bürck C, Glass M, Groitl P, Wimmer P, Kinkley S, et al. Control of human  
789 adenovirus type 5 gene expression by cellular Daxx/ATRX chromatin-associated complexes. Nucleic  
790 Acids Res. 2013 Apr 1;41(6):3532–50.
- 791 61. Guion LG, Sapp M. The Role of Promyelocytic Leukemia Nuclear Bodies During HPV  
792 Infection. Front Cell Infect Microbiol. 2020;10:35.
- 793 62. Huang L, Agrawal T, Zhu G, Yu S, Tao L, Lin J, et al. DAXX represents a new type of protein-  
794 folding enabler. Nature. 2021 Sep 2;597(7874):132–7.
- 795 63. Mahmoudvand S, Shokri S. Interactions between SARS coronavirus 2 papain-like protease and  
796 immune system: A potential drug target for the treatment of COVID-19. Scand J Immunol. 2021  
797 Oct;94(4):e13044.
- 798 64. Drosten C, Günther S, Preiser W, van der Werf S, Brodt H-R, Becker S, et al. Identification of a  
799 Novel Coronavirus in Patients with Severe Acute Respiratory Syndrome. N Engl J Med. 2003 May  
800 15;348(20):1967–76.
- 801 65. Guery B, Poissy J, el Mansouf L, Séjourné C, Ettahar N, Lemaire X, et al. Clinical features and  
802 viral diagnosis of two cases of infection with Middle East Respiratory Syndrome coronavirus: a report  
803 of nosocomial transmission. The Lancet. 2013 Jun;381(9885):2265–72.

- 804 66. Martin M. Cutadapt removes adapter sequences from high-throughput sequencing reads.  
805 EMBnet.journal. 2011 May 2;17(1):10.
- 806 67. Langmead B, Salzberg SL. Fast gapped-read alignment with Bowtie 2. Nat Methods. 2012  
807 Apr;9(4):357–9.
- 808 68. Li H, Handsaker B, Wysoker A, Fennell T, Ruan J, Homer N, et al. The Sequence  
809 Alignment/Map format and SAMtools. Bioinforma Oxf Engl. 2009 Aug 15;25(16):2078–9.
- 810 69. Hsiao T, Conant D, Rossi N, Maures T, Waite K, Yang J, et al. Inference of CRISPR Edits from  
811 Sanger Trace Data. bioRxiv. 2019 Jan 1;251082.
- 812 70. Combredet C, Labrousse V, Mollet L, Lorin C, Delebecque F, Hurtrel B, et al. A molecularly  
813 cloned Schwarz strain of measles virus vaccine induces strong immune responses in macaques and  
814 transgenic mice. J Virol. 2003 Nov;77(21):11546–54.
- 815 71. Le T, Phan T, Pham M, Tran D, Lam L, Nguyen T, et al. BBrowser: Making single-cell data  
816 easily accessible. bioRxiv. 2020 Jan 1;2020.12.11.414136.
